# Supplementary material for: Characterizing the Opportunity Space for Sustainable Hydrothermal Valorization of Wet Organic Wastes
Source: PubMed Central journal article supplement — Environ Sci Technol. 2024 Jan 24;58(5):2528–41. doi: 10.1021/acs.est.3c07394 (PMC10851424; doi:10.1021/acs.est.3c07394), 2024-01-24
Supplement: es3c07394_si_001.pdf [file es3c07394_si_001.pdf]

Supporting Information

for

**Characterizing the Opportunity Space for  
Sustainable Hydrothermal Valorization of Wet Organic Wastes**

Jianan Feng<sup>1</sup>, Yalin Li<sup>2</sup>, Timothy J. Strathmann<sup>3</sup>, Jeremy S. Guest<sup>1,4,\*</sup>

<sup>1</sup> Department of Civil and Environmental Engineering, University of Illinois Urbana-Champaign, Urbana, Illinois 61801, United States

<sup>2</sup> Department of Civil and Environmental Engineering, Rutgers, The State University of New Jersey, Piscataway, New Jersey 08854, United States

<sup>3</sup> Department of Civil and Environmental Engineering, Colorado School of Mines, Golden, Colorado 80401, United States

<sup>4</sup> Institute for Sustainability, Energy, and Environment, University of Illinois Urbana-Champaign, Urbana, Illinois 61801, United States

\* Jeremy S. Guest: email: [jsguest@illinois.edu](mailto:jsguest@illinois.edu) phone: (217) 244-9247

This Supporting Information contains 32 pages, 14 tables, and 7 figures.

## S1. Feedstock characterization

Organic wastes serving as feedstocks for the HTL-based treatment train were characterized based on their moisture content, ash content, and biochemical compositions (lipids, proteins, carbohydrates) (**Table S1**). Based on these assumptions, their elemental compositions were also estimated based on a multi-component linear relationship (**Table S2**). Specifically, carbon, hydrogen, and nitrogen content of lipids ( $C_8H_{16}O$ ), proteins ( $C_{16}H_{24}O_5N_4$ ), and carbohydrates ( $CH_2O$ ) were estimated based on their empirical chemical formula.<sup>1</sup> Phosphorus was estimated based on reported nitrogen to phosphorus ratio for different feedstocks (**Table S1**). Oxygen was estimated based on mass balance as  $1 - C$  (dry weight, dw%) – H (dw%) – N (dw%) – P (dw%) – ash (dw%).

**Table S1.** Biochemical compositions of different organic wastes.

| Organic Waste                 | Moisture [%] | Ash [dry weight%] | Biochemical compositions [ash-free dry weight%] |            |                               | P to N mass ratio | Ref.          |
|-------------------------------|--------------|-------------------|-------------------------------------------------|------------|-------------------------------|-------------------|---------------|
|                               |              |                   | Lipids                                          | Proteins   | Carbohydrates                 |                   |               |
| Sludge                        | 60–80%       | 17.4–41.4%        | 8–30.8%                                         | 38–51%     |                               | 19.4–55.6%        | 2–6           |
| Fats, oils, and greases (FOG) | 10–60%       | 1.49–2.24%        | 91.2–100%                                       | 0–1.23%    |                               | 0–3.5%            | 7–10          |
| Food waste                    | 68–80%       | 2.5–12.6%         | 13–30%                                          | 15–25%     | 100% – lipids%<br>– proteins% | 11.5–28.6%        | 5,6,10<br>–12 |
| Green waste                   | 5.2–69%      | 1.2–48.3%         | 1.04–2.59%                                      | 1.6–8.2%   |                               | 18.7–22.9%        | 13–15         |
| Animal manure                 | 17.4–79.8%   | 13.8–43%          | 3.77–24.7%                                      | 14.3–26.4% |                               | 25.3–38.0%        | 3,4,16        |

**Table S2.** Coefficients used for the estimation of elemental compositions of organic wastes.

|   | Lipids ( $C_8H_{16}O$ )            | Proteins ( $C_{16}H_{24}O_5N_4$ )  | Carbohydrates ( $CH_2O$ )          |
|---|------------------------------------|------------------------------------|------------------------------------|
| C | 0.750 ( $\pm 0.075$ ) <sup>a</sup> | 0.545 ( $\pm 0.055$ ) <sup>a</sup> | 0.400 ( $\pm 0.040$ ) <sup>a</sup> |
| H | 0.125 ( $\pm 0.013$ ) <sup>a</sup> | 0.068 ( $\pm 0.007$ ) <sup>a</sup> | 0.067 ( $\pm 0.007$ ) <sup>a</sup> |
| N | –                                  | 0.159 ( $\pm 0.016$ ) <sup>a</sup> | –                                  |

<sup>a</sup> Uniform distribution.

## S2. System design

### 1. Design basis

The design for HTL-based treatment system was executed using newly released QSDsan<sup>17,18</sup> (using 'pfas' branch updated as of October 28, 2023), a comprehensive modeling platform for quantitative sustainable design of sanitation and resource recovery systems. All the units were coded using python 3.9 and can be publicly accessed through GitHub-Quantitative Sustainable Design (QSD) Group-repositories.<sup>18</sup> The proposed system configuration was based on a 2014 PNNL report,<sup>19</sup> with the addition of struvite precipitation and membrane distillation for nutrient recovery. Detailed unit design assumptions and methods can be found in the following sections. Units not discussed below (e.g., heat exchanger, flash vessel, distillation column) were inherited from previous work in QSDsan and BioSTEAM<sup>20,21</sup> (using 'qsdсан' branch updated as of October 28, 2023).

### 2. Detailed design assumptions and methods

#### i. Hydrothermal liquefaction (HTL)

HTL converted wet biomass into biocrude, hydrochar, an aqueous phase, and off-gas under subcritical temperatures (250 to 350 °C) and high pressure (3050 psia). We used a revised multi-component additivity (MCA) model<sup>22,23</sup> to estimate the yields and elemental compositions of each HTL product (**Table S3**). All calculations were done on an ash free dry weight (afdw) basis. Except for lipid-to-biocrude (0.846) which followed a triangular distribution, other parameters with uncertainties were assigned normal distributions. All ash content from HTL feedstocks were assumed to be partitioned into the aqueous phase (consistent with Leow et al.<sup>23</sup>). The gas phase was >90% CO<sub>2</sub> with a small amount of CH<sub>4</sub> and C<sub>2</sub>H<sub>6</sub>. The gas compositions were based on simulations from Jones et al.<sup>19</sup> Biocrude moisture content was 5.6%, the same as our reference model.<sup>19</sup>

**Table S3.** Revised MCA model parameters.

| HTL Product | Lipids               | Proteins        | Carbohydrates   |
|-------------|----------------------|-----------------|-----------------|
| Biocrude    | 0.846 (0.692, 1.000) | 0.445 (± 0.030) | 0.205 (± 0.050) |
| Aqueous     | 0.154                | 0.481           | –               |
| Gas         | –                    | 0.074 (± 0.020) | 0.418 (± 0.030) |
| Hydrochar   | –                    | –               | 0.377           |

Elemental distributions in HTL oil and solid phases were calculated based on MCA model (**Table S4**), with AOSc (average oxidation state) calculated using the equation in Li et al.<sup>22</sup> Carbon in the gas phase was calculated based on estimated gas compositions. Nitrogen was assumed to partition to the biocrude and aqueous phases.<sup>23,24</sup> 86% (84 to 88%) of phosphorus was assumed to be in hydrochar after the HTL reaction in the form of inorganic phosphate.<sup>24,25</sup> The remaining phosphorus was assumed to be in the aqueous phase. The MCA model can also be used to estimate the TOC and TN concentrations (in mg·L<sup>-1</sup>) in the aqueous phase product, but in this study elements in the aqueous phase were calculated based on mass balance closure to accommodate uncertainties associated with the aqueous phase volume. The MCA was validated on wastewater sludge and animal manure in Li et al.<sup>22</sup> Validation for food waste, FOG, and green waste (limited to the biocrude yield) were included in **Table S5**. The auxiliary units for HTL include

knockout drums for gas separation, a solid filter for hydrochar recovery, and a gravimetric oil/water separator to vent gas and separate biocrude and aqueous phase by gravity, and knockout drums to remove any liquid from the off-gas.

**Table S4.** MCA model parameters for elemental composition of biocrude.

| Elemental Composition    | Input              | Slope                | Intercept          |
|--------------------------|--------------------|----------------------|--------------------|
| Biocrude-C               | AOSc               | -8.37 ( $\pm$ 1.84)  | 68.6 ( $\pm$ 0.72) |
| Biocrude-N               | Protein [dw%]      | 0.133 ( $\pm$ 0.010) | -                  |
| Biocrude-H               | AOSc               | -2.61 ( $\pm$ 0.69)  | 8.20 ( $\pm$ 0.27) |
| Hydrochar-C <sup>a</sup> | Carbohydrate [dw%] | 1.75 ( $\pm$ 0.24)   | -                  |

<sup>a</sup> The smaller value between the calculated result and 0.65 was used.

**Table S5.** Experimental data (from literature) and MCA predicted biocrude yields (for food waste, FOG, and green waste).

| Waste       | Feedstock [afdw%] |          |               | Yield [afdw%] |              | References |
|-------------|-------------------|----------|---------------|---------------|--------------|------------|
|             | Lipids            | Proteins | Carbohydrates | Experimental  | Predicted    |            |
| Food waste  | 16.6              | 29.1     | 54.3          | 28 to 30      | 32.0 to 44.3 | 26         |
| Food waste  | 22.2              | 18.0     | 59.8          | 37.5          | 32.1 to 46.0 | 27         |
| Food waste  | ~35               | ~24      | ~41           | ~40 to 46.9   | 40.5 to 56.9 | 28         |
| Food waste  | 5.3               | 18.4     | 61.1          | 27.6          | 20.8 to 29.6 | 9          |
| Food waste  | 19                | 27       | 54            | 45            | 32.7 to 45.6 | 9          |
| Food waste  | -                 | -        | -             | 32 to 58      | 35.6 to 53.4 | 29         |
| FOG         | -                 | -        | -             | 76.3          | 64.9 to 100  | 30         |
| FOG         | -                 | -        | -             | 49 to 88      | 64.9 to 100  | 9          |
| Green waste | 0.7               | 10.8     | 80.4          | 23.3          | 17.4 to 26.3 | 9          |
| Green waste | 8                 | 2        | 90            | 24.3          | 20.3 to 31.9 | 9          |
| Green waste | -                 | -        | -             | 4.4 to 40.9   | 16.5 to 29.2 | 30,31      |

As the feedstocks for HTL reactor at low temperatures have very high viscosity (0.002 to 0.065 m<sup>2</sup>·s<sup>-1</sup>),<sup>32</sup> the heat exchanger for HTL feedstock heating is typically oversized to overcome the potential fouling issue. In our design, we enforced the total heat transfer efficiency of HTL heat exchanger to 3 to 4 BTU·hr<sup>-1</sup>·ft<sup>-2</sup>·F<sup>-1</sup> (0.0170 to 0.0227 kW·m<sup>-2</sup>·K), which was an order of magnitude lower than the heat transfer efficiency of low-viscosity feedstock (26 to 274 BTU·hr<sup>-1</sup>·ft<sup>-2</sup>·F<sup>-1</sup>).<sup>32</sup> The HTL heat exchanger design process included the following steps:<sup>21</sup>

1. Calculated the log-mean temperature difference (*LMTD*) of an ideal counterflow or co-current heat exchanger using **Eq. S1** to **Eq. S5**.

$$dTF_1 = T_{h,i} - T_{c,o} \quad (\text{S1})$$

$$dTF_2 = T_{h,o} - T_{c,i} \quad (\text{S2})$$

$$dTF_{2,1} = dTF_2 - dTF_1 \quad (\text{S3})$$

where  $T_{h,i}$ ,  $T_{c,o}$ ,  $T_{h,o}$ , and  $T_{c,i}$  represented inlet temperature of hot fluid [K], outlet temperature of cold fluid [K], outlet temperature of hot fluid [K], and inlet temperature of cold fluid [K], respectively. If the absolute value of  $dTF_{2,1}$  was less than 10<sup>-8</sup>:

$$LMTD = dTF_1 \quad (\text{S4})$$

If not:

$$LMTD = \frac{dT_{F2,1}}{\ln \frac{dT_2}{dT_1}} \quad (S5)$$

2. Calculated the heat transfer area (A) of HX tubes using **Eq. 6**.

$$A = \frac{Q}{U \cdot LMTD \cdot ft} \quad (S6)$$

where Q was the heating duty (including environmental losses) [ $\text{kJ} \cdot \text{hr}^{-1}$ ] of the heat exchanger, U was the enforced total heat transfer efficiency [ $\text{kW} \cdot \text{m}^{-2} \cdot \text{K}^{-1}$ ], and ft was the LMTD correction factor and can be calculated based on equations in Fahkeri et al. If A was less than 150 ft<sup>2</sup>, we assumed the heat exchanger type to be double pipe. If not, we assumed the heat exchanger type to be floating head.

3. Calculated the purchase cost [2013\$] of the HTL heat exchanger based on the type using **Eq. 7** or **Eq. 8** and converted the cost to 2020\$.

$$\text{purchase cost (double pipe)} = e^{7.2718+0.16 \cdot \ln A} \quad (S7)$$

$$\text{purchase cost (floating head)} = e^{12.0310-0.8709 \cdot \ln A+0.09005 \cdot (\ln A)^2} \quad (S8)$$

## ii. Catalytic hydrothermal gasification (CHG)

HTL aqueous phase had very high COD content, therefore, cannot be discharged directly. CHG was used in our system after struvite precipitation (discussed below) to valorize COD to fuel gases. Heterogeneous catalyst 7.8% Ru/C (7.8% w/w ruthenium on a carbon support) was used in CHG.<sup>19</sup> About 56.55% of carbon was gasified into CH<sub>4</sub>, C<sub>2</sub>H<sub>6</sub>, C<sub>3</sub>H<sub>8</sub>, and CO<sub>2</sub>, with the ratio (**Table S6**) referred to by Jones et al.<sup>19</sup> CHG products were then passed to a flash vessel to separate gas based on vapor-liquid-equilibrium (VLE). Gas components were sent to a combined heat and power (CHP) unit and can provide energy and electricity for the system.<sup>34</sup> The rest of carbon and nitrogen were assumed to be in the forms of HCO<sub>3</sub><sup>-</sup> and NH<sub>4</sub><sup>+</sup> in CHG effluent.<sup>19</sup>

**Table S6.** CHG, hydrotreating, and hydrocracking products (values shown in w/w).

| Product              | CHG <sup>a</sup> | hydrotreating | hydrocracking |
|----------------------|------------------|---------------|---------------|
| H <sub>2</sub>       | 0.0001           | –             | –             |
| CO <sub>2</sub>      | 0.432            | –             | 0.0388        |
| Methane              | 0.527            | 0.0228        | 0.0063        |
| Ethane               | 0.011            | 0.0292        | –             |
| Propane              | 0.030            | 0.0165        | –             |
| Butane               | –                | 0.0087        | –             |
| Butane, 2-methyl-    | –                | 0.0041        | –             |
| Pentane              | –                | 0.0068        | –             |
| Pentane, 2-methyl-   | –                | 0.0041        | –             |
| Hexane               | –                | 0.0041        | 0.0116        |
| Hexane, 2-methyl-    | –                | 0.0041        | –             |
| Heptane              | –                | 0.0041        | 0.1202        |
| Cyclohexane, methyl- | –                | 0.0102        | –             |
| Piperidine           | –                | 0.0041        | –             |
| Toluene              | –                | 0.0102        | –             |
| Heptane, 3-methyl-   | –                | 0.0102        | –             |

|                                                  |   |        |        |
|--------------------------------------------------|---|--------|--------|
| Octane                                           | – | 0.0102 | 0.0851 |
| Cyclohexane, ethyl-                              | – | 0.0041 | –      |
| Ethylbenzene                                     | – | 0.0204 | –      |
| o-Xylene                                         | – | 0.0102 | –      |
| Nonane                                           | – | 0.0102 | 0.0952 |
| Cyclohexane, propyl-                             | – | 0.0041 | –      |
| Benzene, propyl-                                 | – | 0.0102 | –      |
| Nonane, 4-methyl-                                | – | –      | –      |
| Decane                                           | – | 0.0204 | 0.1231 |
| Benzene, butyl-                                  | – | 0.0122 | –      |
| Undecane                                         | – | 0.0204 | 0.1764 |
| 1-Phenyl-1-butene                                | – | 0.0204 | –      |
| Dodecane                                         | – | 0.0204 | 0.1382 |
| Tridecane                                        | – | –      | 0.0974 |
| Tetradecane                                      | – | –      | 0.0486 |
| Naphthalene, 1,2,3,4-tetrahydro-                 | – | 0.0102 | –      |
| Benzene, hexyl-                                  | – | 0.0204 | –      |
| Naphthalene, 1,2,3,4-tetrahydro-6-methyl         | – | 0.0204 | –      |
| Benzene, heptyl-                                 | – | 0.0204 | –      |
| Benzene, octyl-                                  | – | 0.0204 | –      |
| 1,4-Cyclohexanedicarboxylic acid, dimethyl ester | – | 0.0184 | –      |
| Pentadecane                                      | – | 0.0612 | 0.0340 |
| Hexadecane                                       | – | 0.1836 | 0.0201 |
| Heptadecane                                      | – | 0.0816 | 0.0045 |
| Octadecane                                       | – | 0.0408 | 0.0010 |
| Nonadecane                                       | – | 0.0408 | 0.0052 |
| Eicosane                                         | – | 0.1020 | 0.0003 |
| Heneicosane                                      | – | 0.0408 | –      |
| Tricosane                                        | – | 0.0408 | –      |
| 1,2-Benzenedicarboxylic acid, diisooctyl ester   | – | 0.0082 | –      |
| Heptyl undecyl phthalate                         | – | 0.0102 | –      |
| Triacontane                                      | – | 0.0020 | –      |

<sup>a</sup> Not including H<sub>2</sub>O and soluble components.

### iii. Hydrotreating

Biocrude from HTL needed to be further upgraded to meet the market requirement. Widely used hydrotreating followed by hydrocracking (next section) was selected for HTL biocrude refinement.

Major assumptions made for hydrotreating were:

1. The H<sub>2</sub> amount reacted was assumed to be fixed at 4.6 wt% of biocrude, the same as previous work.<sup>23</sup> However, to maintain a H<sub>2</sub> headspace and ensure complete reaction, 3 times the reacted H<sub>2</sub> amount was fed.<sup>19</sup>
2. 87.5 wt% of biocrude and reacted H<sub>2</sub> were converted to hydrocarbon with CoMo/alumina (cobalt molybdenum on an alumina support) as the catalyst.<sup>19</sup>

3. The hydrotreating products were scaled from the reference. The percentages of each product can be found in **Table S6**.
4. One flash vessel and three distillation columns in series were used to separate hydrotreating products into aqueous, fuel gas, naphtha, diesel, and heavy oil. The aqueous phase was discharged and managed at a water resource recovery facility (WRRF; a.k.a. wastewater treatment plant, WWTP), fuel gases were burnt in the CHP system, naphtha and diesel were cooled down before storage, and heavy oil was further cracked in a hydrocracking unit. Flash vessel and distillation columns were inherited from BioSTEAM.

#### iv. Hydrocracking

Hydrocracking further broke down heavy oil from hydrotreating to naphtha and gasoline. Major assumptions for hydrocracking design included:

1. The amount of H<sub>2</sub> reacted was assumed to be fixed at 1.1 wt% of heavy oil, the same as previous work.<sup>23</sup> However, to maintain a H<sub>2</sub> headspace and ensure complete reaction, 5.6 times the amount of reacted H<sub>2</sub> was fed.<sup>19</sup>
2. 100 wt% of heavy oil and reacted H<sub>2</sub> was converted to hydrocarbon with CoMo/alumina as the catalyst.<sup>19</sup>
3. The hydrocracking products were scaled from the reference. The percentages of each product can be found in **Table S6**.
4. One flash vessel and one distillation column were used to separate hydrocracking products into fuel gas, naphtha, and diesel. Fuel gas was burnt in the CHP system; naphtha and diesel were cooled down before storage.

#### v. Phosphorus recovery

86% of phosphorus stayed in HTL produced hydrochar and could be extracted and recovered as fertilizers.<sup>24,25</sup> Therefore, an acid extraction followed by struvite precipitation was proposed for phosphorus recovery. According to proposed system flow, an average of 70% (49.9% to 90.2%) phosphorus<sup>24,25</sup> in hydrochar was extracted by acid (0.5 M H<sub>2</sub>SO<sub>4</sub>, 1:10 g·mL<sup>-1</sup>). Then, phosphorus-rich extractant was mixed with the NH<sub>4</sub><sup>+</sup>-rich HTL aqueous stream for struvite precipitation, supplemented with MgCl<sub>2</sub> (molar ratio Mg:PO<sub>4</sub><sup>3-</sup> = 1.5:1 to 4:1) and NH<sub>4</sub>Cl (if needed, to ensure excess amount of N). MgO was also added to maintain a pH of around 9.5.<sup>35</sup> The reported K<sub>sp</sub> of struvite in the literature is usually smaller than 10<sup>-10</sup>.<sup>36</sup> Therefore, instead of using a kinetic model (which always predicted ~100% phosphorus precipitation), we estimated phosphorus recovery based on published experimental data and assumed the baseline struvite precipitation recover 82.8% of phosphorus.<sup>25</sup>

#### vi. Nitrogen recovery

Part of the nitrogen in the HTL aqueous phase was recovered with phosphorus during struvite precipitation. The rest of the nitrogen (both organic and inorganic) was converted to NH<sub>4</sub><sup>+</sup> during CHG. The high concentration of NH<sub>4</sub><sup>+</sup> precluded the possibility of direct discharge of CHG effluent. A membrane distillation unit was therefore modeled to recover NH<sub>4</sub><sup>+</sup> as ammonium sulfate. The driving force of the membrane distillation was the vapor pressure difference of NH<sub>3</sub> across a hydrophobic membrane generated due to different temperature and pH between the feed side

and permeate side. 0.5 M H<sub>2</sub>SO<sub>4</sub> was used to produce ammonium sulfate in the permeate side. The flux of ammonia across the membrane was calculated using the equation below:<sup>37</sup>

$$J_{NH_3,f} = k_f C_{NH_3,f} \ln\left(\frac{X_{NH_3,f,m} - X_{NH_3,p}}{X_{NH_3,f} - X_{NH_3,p}}\right) \quad (S9)$$

$k_f$  was the feed side mass transfer coefficient and can be calculated using **Eq. S10**.<sup>38</sup>  $C_{NH_3}$  was the concentration of NH<sub>3</sub> in the feed and can be calculated as a function of feed pH value.  $X_{NH_3,f,m}$ ,  $X_{NH_3,f}$ , and  $X_{NH_3,p}$  were NH<sub>3</sub> molar fractions in membrane, feed, and permeate, respectively.  $X_{NH_3,p}$  was approximated as 0 due to low pH in the permeate.  $X_{NH_3,f,m}$  and  $X_{NH_3,f}$  were calculated using the established VLE relationship in BioSTEAM.

$$\frac{1}{K_a} = \frac{1}{k_f} + \frac{1}{Hk_m} \left(1 + \frac{k_b}{[OH]'}\right) \quad (S10)$$

$K_a$  was the overall mass transfer coefficient and was estimated based on published experimental data.<sup>38</sup>  $H$  was dimensionless Henry's law constant and was calculated using **Eq. S11**.<sup>39</sup>  $k_m$  represented the membrane mass transfer coefficient and was calculated using **Eq. S12**.<sup>38</sup>  $k_b$  was the base dissociation constant of NH<sub>3</sub> and can be calculated by **Eq. S13**.

$$H = \frac{H'}{RT} \quad (S11)$$

$H'$  is the Henry's law constant with dimension for NH<sub>3</sub> (1.63 Pa·m<sup>3</sup>·mol<sup>-1</sup>).  $R$  is the ideal gas constant (8.3145 Pa·m<sup>3</sup>·mol<sup>-1</sup>·K<sup>-1</sup>) and  $T$  is the influent aqueous temperature (333.15 K).

$$k_m = \frac{D_m \varepsilon}{\tau \delta} \quad (S12)$$

$\varepsilon$ ,  $\tau$ , and  $\delta$  were membrane porosity, tortuosity, and thickness, respectively.  $D_m$  was the molecular diffusivity of ammonia in air.<sup>40</sup>

$$k_b = \frac{k_w}{k_a} \quad (S13)$$

$k_w$  was the water dissociation equilibrium constant.  $k_a$  was the acid dissociation constant of NH<sub>4</sub><sup>+</sup> at 333.15 K and can be adjusted based on the van't Hoff equation (**Eq. S14**).

$$\ln\left(\frac{k_a}{k_{a,0}}\right) = \frac{\Delta H^0}{R} \left(\frac{1}{T_0} - \frac{1}{T}\right) \quad (S14)$$

$k_{a,0}$  was the acid dissociation constant of NH<sub>4</sub><sup>+</sup> at  $T_0$  (298 K).  $\Delta H^0$  was the standard enthalpy of the NH<sub>4</sub><sup>+</sup> dissociation reaction (52.22 kJ·mol<sup>-1</sup>) at  $T_0$ .

The baseline values and distribution of other parameters included in this section can be found in **Table S11**.

### vii. Unit designs

The designs (dimensions and material usage) of HTL, CHG, hydrotreating, hydrocracking, acid extraction (AcidEx), and struvite precipitation (StruPre) were done using BioSTEAM design tools. Detailed parameters can be found in **Table S7**. The flash vessel and distillation column were inherited from BioSTEAM without changes.



**Table S7.** Design parameters for unit operations in the HTL-based treatment train (100 dry tonne-day<sup>-1</sup> capacity).

| Parameter                                               | HTL                      | CHG      | hydrotreating | hydrocracking | AcidEx       | StruPre      |
|---------------------------------------------------------|--------------------------|----------|---------------|---------------|--------------|--------------|
| Temperature (T) [°C]                                    | 351                      | 349      | 402           | 451           | 25           | 25           |
| Pressure (P) [MPa]                                      | 21.0                     | 21.2     | 10.5          | 7.0           | 0.1          | 0.1          |
| # of reactors (N) [-]                                   | 4                        | 6        | 1             | 1             | 2            | 2            |
| Single reactor volume [m <sup>3</sup> ]                 | 3.65                     | 2.37     | 11.4          | 6.11          | 10           | 20           |
| Length [m]                                              | 152                      | 2.3      | 3.9           | 3.1           | 3.7          | 4.7          |
| Inner diameter [m]                                      | 0.18                     | 1.15     | 1.94          | 1.57          | 1.85         | 2.33         |
| Wall thickness [m]                                      | 0.03                     | 0.18     | 0.14          | 0.11          | 0.01         | 0.01         |
| Tau <sup>a</sup> [h]                                    | 0.25                     | 0.33     | 0.5           | 5             | 2            | 1            |
| Type                                                    | pressure vessel (PV)     | PV       | PV            | PV            | storage tank | storage tank |
| Material                                                | stainless steel (SS) 316 | SS 316   | SS 316        | SS 316        | SS 304       | carbon steel |
| Vessel type                                             | Horizontal               | vertical | vertical      | vertical      | vertical     | vertical     |
| WHSV <sup>b</sup> [g·g <sup>-1</sup> ·h <sup>-1</sup> ] | –                        | 3.56     | 0.625         | 0.625         | –            | –            |

<sup>a</sup> Retention time.

<sup>b</sup> Weight hourly space velocity.

### S3. Mass and energy balance

Using QSDsan, the influent and effluent streams of each unit were automatically simulated to determine the mass and energy flows, enabling mass balances for key elements (i.e., carbon, nitrogen, and phosphorus). Energy balances considered heating/cooling of units, thermal losses, and streams' chemical energy (measured as higher heating values, HHVs). For streams consisting of defined chemicals (e.g., diesel consisting of chemicals listed in **Table S6**), we used BioSTEAM for HHV calculations. For streams that did not require full characterization or for which full composition details were unknown (e.g., organic wastes), we estimated their elemental composition and calculated their HHV using the Dulong equation:<sup>41</sup>

$$\text{HHV (MJ}\cdot\text{kg}^{-1}) = 0.338 \times \text{C}\% + 1.428 \times (\text{H}\% - 0.125 \times \text{O}\%) \quad (\text{S15})$$

where C%, H%, and O% represent dry weight% of carbon, hydrogen, and oxygen, respectively.

### S4. Techno-economic analysis (TEA)

The capital cost and operation and maintenance cost calculations were automated using existing algorithms in QSDsan.<sup>42</sup> The capital costs (purchase cost and total installed cost, TIC) for key equipment in the HTL-based system was listed in **Table S8**. Information for operation and maintenance cost estimation (e.g., chemical prices, labor costs) were included in **Table S9**.

**Table S8.** Capital costs for key equipment in an HTL-based system (100 dry tonne·day<sup>-1</sup> capacity).

| Equipment                                | Purchase cost [\$] | Total Installed cost [\$] |
|------------------------------------------|--------------------|---------------------------|
| <b>HTL</b>                               |                    |                           |
| Feedstock pump                           | 92,400             | 159,000                   |
| Reactor heater                           | 875,000            | 1,480,000                 |
| HTL reactor                              | 1,800,000          | 3,540,000                 |
| Knockout drum                            | 605,000            | 1,500,000                 |
| Solids filter & oil/water separator      | 432,000            | 820,000                   |
| <b>CHG</b>                               |                    |                           |
| Feed pump                                | 98,000             | 169,000                   |
| Hydrocyclone                             | 791,000            | 1,660,000                 |
| Guard bed                                | 35,400             | 70,800                    |
| GHG reactor                              | 1,460,000          | 3,600,000                 |
| <b>Hydrotreating &amp; Hydrocracking</b> |                    |                           |
| HT reactor                               | 414,000            | 1,020,000                 |
| HC reactor                               | 271,000            | 667,000                   |
| <b>CHP<sup>a</sup></b>                   |                    |                           |
| CHP (total)                              | N/A <sup>b</sup>   | 12,400,000                |
| CHP (allocated to HTL)                   | N/A                | 4,860,000                 |
| CHP (allocated to CHG)                   | N/A                | 5,160,000                 |
| CHP (allocated to HT & HC)               | N/A                | 1,790,000                 |

<sup>a</sup> The cost of CHP was allocated to different based on percentage of energy provided (HTL: 39.2%, CHG: 41.7%, hydrotreating & hydrocracking: 14.4%, exported as electricity: 4.8%).

<sup>b</sup> Only the installed cost of CHP was calculated using equations from Shoener et al.<sup>34</sup> and Havukainen et al.<sup>43</sup>

Integrated TEA-LCA were performed based on *n*th plant assumptions, which exclude any cost and environmental impacts due to technological immaturity (consistent with the standards of practice in bioenergy assessments<sup>6,19</sup>). We used discounted cash flow rate of return analyses to calculate the waste management cost and (separately) the minimum diesel selling price (MDSP). Specifically, the initial capital costs (CAPEX) were distributed over the plant's lifetime with a discount rate to account for the time value of money. Operation and maintenance (O&M) cost were determined by the QSDsan cost algorithms with assumptions in **Table S9**. For auxiliary units (e.g., knockout drum, sulfur guard), costs were scaled using parameters provided in Jones et al.<sup>19</sup> Detailed TEA procedures can be found in the QSDsan tutorial paper.<sup>17</sup>

**Table S9.** TEA baseline assumptions.

| Parameters                                          | Values                                                                               |
|-----------------------------------------------------|--------------------------------------------------------------------------------------|
| Internal rate of return                             | 3% (waste) / 10% (biofuel)                                                           |
| Project lifetime                                    | 30 years                                                                             |
| Income tax                                          | 35%                                                                                  |
| Yearly operating days                               | 330                                                                                  |
| Construction schedule                               | 3 years(8% 1 <sup>st</sup> year, 60% 2 <sup>nd</sup> year, 32% 3 <sup>rd</sup> year) |
| Startup month                                       | 6                                                                                    |
| Startup fixed operating cost fraction               | 1                                                                                    |
| Startup sales fraction                              | 0.5                                                                                  |
| Startup volatile operating cost fraction            | 0.75                                                                                 |
| Working capital over fixed capital investment (FCI) | 5%                                                                                   |
| Finance interest                                    | 3% (waste) / 8% (biofuel)                                                            |
| Finance years                                       | 10                                                                                   |
| Finance fraction                                    | 0.6                                                                                  |
| Warehouse                                           | 4% of installed equipment cost                                                       |
| Site development                                    | 9% of inside battery limits (ISBL)                                                   |
| Additional piping                                   | 4.5% of ISBL                                                                         |
| Proratable costs                                    | 10% of total direct cost (TDC)                                                       |
| Field expenses                                      | 10% of TDC                                                                           |
| Home office and construction                        | 20% of TDC                                                                           |
| Project Contingency                                 | 10% of TDC                                                                           |
| Other indirect costs                                | 10% of TDC                                                                           |
| Labor cost [\$·yr <sup>-1</sup> ]                   | 2.5x10 <sup>6</sup>                                                                  |
| Labor burden                                        | 90%                                                                                  |
| Property insurance and taxes                        | 0.7% of FCI                                                                          |
| Maintenance                                         | 3% of total indirect cost                                                            |
| Steam power depreciation                            | MACRS20                                                                              |

## S5. Life cycle assessment (LCA)

Unit environmental impacts of the HTL-based system were estimated based on the raw material requirements and emissions during construction and operation of the facility. We report environmental impacts across nine impact categories from the U.S. EPA's Tool for the Reduction and Assessment of Chemicals and Other Environmental Impacts (TRACI).<sup>44</sup> Life cycle inventory data were gathered from the Ecoinvent v3.8 database.<sup>45</sup> A summary of the unit impacts for raw materials, ancillary inputs, and unit processes are summarized below. The nine impact categories include global warming potential (GWP; a.k.a. carbon intensity, CI), acidification (ACD), ecotoxicity (ECO), eutrophication (EUT), ozone depletion (OZD), photochemical oxidation (PHO), carcinogenics (CAR), non-carcinogenics (NCA), and respiratory effects (RES). The values of unit impacts for each individual construction item, material, and energy source are listed in **Table S10**. A detailed description of LCA algorithms was provided in Li et al.<sup>17</sup>

**Table S10.** Unit impacts of raw materials, ancillary inputs, and unit processes.

| Raw Materials,<br>Ancillary<br>Inputs, Unit<br>Processes | Unit           | GWP<br>kg CO <sub>2</sub> -eq | ACD<br>[H <sup>+</sup> ]-eq | ECO<br>kg 2,4-D-eq | EUT<br>kg N-eq | OZD<br>kg CFC-11-eq | PHO<br>kg NO <sub>x</sub> -eq | CAR<br>kg benzene-eq | NCA<br>kg toluene-eq | RES<br>kg PM <sub>2.5</sub> -eq |
|----------------------------------------------------------|----------------|-------------------------------|-----------------------------|--------------------|----------------|---------------------|-------------------------------|----------------------|----------------------|---------------------------------|
| Furnace                                                  | kg             | 1.26                          | 0.45675                     | 2.5042             | 0.00047234     | 7.1820E-08          | 0.0036727                     | 0.044932             | 49.582               | 0.0026779                       |
| Concrete                                                 | kg             | 0.11295                       | 0.019506                    | 0.048836           | 2.4132E-05     | 6.02E-09            | 0.0003157                     | 0.00022              | 1.2785               | 0.00007732                      |
| Compressor<br>(4kW)                                      | ea             | 670.18                        | 532.58                      | 3736.8             | 0.2647         | 4.55E-05            | 2.5206                        | 90.241               | 79229                | 2.891                           |
| Compressor<br>(300kW)                                    | ea             | 12540                         | 8314.4                      | 57484              | 4.2713         | 0.00077645          | 43.493                        | 1361.3               | 1215800              | 47.312                          |
| Stainless<br>steel                                       | kg             | 4.8562                        | 1.2979                      | 7.2036             | 0.00083218     | 1.96E-07            | 0.012186                      | 0.13854              | 164.73               | 0.016851                        |
| Carbon<br>steel                                          | kg             | 2.0028                        | 0.40517                     | 2.0272             | 0.00060429     | 8.76E-08            | 0.0048205                     | 0.010698             | 25.211               | 0.0031905                       |
| Reinforcing<br>steel                                     | kg             | 2.169                         | 0.41317                     | 1.7266             | 0.00048311     | 1.02E-07            | 0.0053051                     | 0.007312             | 24.747               | 0.0032199                       |
| RO membrane                                              | m <sup>2</sup> | 2.2663                        | 0.53533                     | 0.90848            | 0.0028322      | 2.55E-07            | 0.0089068                     | 0.034791             | 31.8                 | 0.0028778                       |
| H <sub>2</sub> SO <sub>4</sub>                           | kg             | 0.008206                      | 0.019679                    | 0.069909           | 4.05E-06       | 8.94E-10            | 5.04E-05                      | 1.74E-03             | 1.6824               | 9.41E-05                        |
| MgCl <sub>2</sub>                                        | kg             | 2.8779                        | 0.77016                     | 0.97878            | 0.00039767     | 4.94E-08            | 0.0072306                     | 0.005094             | 8.6916               | 0.004385                        |
| H <sub>2</sub>                                           | kg             | 1.5624                        | 0.81014                     | 0.42747            | 0.0029415      | 1.80E-06            | 0.0052545                     | 0.002627             | 8.5687               | 0.0036698                       |
| MgO                                                      | kg             | 1.1606                        | 0.12584                     | 2.7949             | 0.00063607     | 1.54E-08            | 0.0017137                     | 0.018607             | 461.54               | 0.0008755                       |
| NaOH                                                     | kg             | 1.2514                        | 0.33656                     | 0.77272            | 0.00032908     | 7.89E-07            | 0.0033971                     | 0.007004             | 13.228               | 0.0024543                       |
| NH <sub>4</sub> Cl                                       | kg             | 1.525                         | 0.34682                     | 0.90305            | 0.0047381      | 9.22E-08            | 0.0030017                     | 0.010029             | 14.85                | 0.0018387                       |
| Struvite                                                 | kg             | 0.42085                       | 0.12283                     | 0.26961            | 0.00017495     | 2.2955E-08          | 0.0010441                     | 0.002983             | 4.4965               | 0.0006176                       |

|                                                 |     |          |          |          |            |            |           |          |          |            |
|-------------------------------------------------|-----|----------|----------|----------|------------|------------|-----------|----------|----------|------------|
| (NH <sub>4</sub> ) <sub>2</sub> SO <sub>4</sub> | kg  | 1.2499   | 0.72917  | 3.4746   | 0.0024633  | 6.12E-08   | 0.0044519 | 0.036742 | 62.932   | 0.0031315  |
| Natural gas                                     | kg  | 1.5842   | 0.083823 | 0.063446 | 7.25E-05   | 1.2338E-07 | 0.0009737 | 0.000666 | 3.6320   | 0.00035092 |
| Electricity                                     | kWh | 0.67848  | 0.158    | 0.26664  | 9.42E-05   | 2.02E-08   | 0.0015334 | 0.001125 | 2.1274   | 0.0013398  |
| Diesel                                          | kg  | 0.47694  | 0.25164  | 0.18748  | 0.0010547  | 6.42E-07   | 0.0019456 | 0.000693 | 2.9281   | 0.0011096  |
| CHG catalyst                                    | kg  | 484.76   | 991.65   | 15371    | 0.45019    | 2.2341E-05 | 6.7354    | 1.6168   | 27306    | 3.51717965 |
| Hydrotreating & hydrocracking catalyst          | kg  | 6.1901   | 4.0451   | 50.260   | 0.0057495  | 1.3746E-06 | 0.029472  | 0.28738  | 369.47   | 0.02072    |
| Al <sub>2</sub> O <sub>3</sub>                  | kg  | 1.5976   | 0.59951  | 1.7233   | 0.00042279 | 1.50E-07   | 0.005035  | 0.011164 | 14.368   | 0.0027805  |
| Deionized water                                 | kg  | 0.000302 | 0.000117 | 0.005015 | 7.31E-08   | 1.61E-10   | 7.46E-07  | 6.19E-06 | 0.009977 | 6.89E-07   |
| H <sub>3</sub> PO <sub>4</sub>                  | kg  | 1.3291   | 0.87049  | 2.5164   | 0.00066305 | 1.47E-07   | 0.004309  | 0.062976 | 61.475   | 0.0044926  |
| MoO <sub>3</sub>                                | kg  | 7.9395   | 10.629   | 303.18   | 0.0078753  | 3.05E-07   | 0.11306   | 0.10345  | 629.38   | 0.059407   |
| CoO                                             | kg  | 31.053   | 19.785   | 85.906   | 0.034405   | 3.78E-06   | 0.081471  | 3.1156   | 3167.2   | 0.099498   |
| Sulfur                                          | kg  | 0.12414  | 0.47894  | 0.028032 | 4.20E-05   | 1.53E-08   | 0.0003138 | 0.000152 | 1.2511   | 0.0022545  |
| Hydrogen                                        | kg  | 1.5624   | 0.81014  | 0.42747  | 0.0029415  | 1.80E-06   | 0.0052545 | 0.002627 | 8.5687   | 0.0036698  |
| Activated carbon                                | kg  | 2.9998   | 0.99434  | 3.0363   | 0.00042365 | 8.81E-08   | 0.0076183 | 0.008292 | 17.436   | 0.0048919  |
| Rhodium                                         | kg  | 81893    | 168410   | 2612400  | 76.454     | 0.0037726  | 1143.7    | 273.49   | 4638900  | 597.08     |
| Cl <sub>2</sub>                                 | kg  | 0.94164  | 0.24282  | 0.57521  | 0.0002285  | 5.71E-07   | 0.0023602 | 0.005184 | 8.4166   | 0.0019114  |
| N <sub>2</sub>                                  | kg  | 0.41978  | 0.098525 | 0.1681   | 6.13E-05   | 1.09E-08   | 0.0009964 | 0.000704 | 1.4612   | 0.00084699 |
| Cooling                                         | MJ  | 0.066033 | 0.008253 | 0.025761 | 5.99E-06   | 4.89E-09   | 7.29E-05  | 0.000418 | 0.46216  | 5.06E-05   |
| Natural gas (MJ)                                | MJ  | 0.064337 | 0.003404 | 0.002577 | 2.95E-06   | 5.01E-09   | 3.95E-05  | 2.71E-05 | 0.1475   | 1.43E-05   |
| Steam                                           | MJ  | 0.11946  | 0.020162 | 0.050719 | 1.58E-05   | 8.84E-09   | 0.0001616 | 0.000121 | 0.30595  | 9.53E-05   |

## S6. Uncertainty analysis

The criteria for the selection of uncertainty distributions followed guidance by Li et al.<sup>46</sup> with modification.

- Criterion 1. For parameters where the distributions can be found in literature (e.g., MCA model coefficients), we used the same distributions as the literature.
- Criterion 2. For parameters where only the ranges can be found in literature (e.g., sludge moisture), we chose a uniform distribution with the minimum and maximum limits as the lower and upper bounds of the distribution and the average value of the minimum and maximum limits as the baseline.
- Criterion 3. For parameters where only a single value can be found in the literature and is based on empirical formulae (e.g., elemental coefficients in **Table S2**), this value was assigned as the baseline and uniform distributions were set from 90% to 110% of the baseline value.
- Criterion 4. For parameters with no known distribution in the literature:
  - Criterion 4.1. If more than 20 data points were found in the literature, we selected triangular distributions and used 5<sup>th</sup>, 50<sup>th</sup>, and 95<sup>th</sup> percentiles from the literature values as the minimum, most probable, and maximum values.
  - Criterion 4.2. If only 5 to 20 data points were found in the literature, we selected triangular distributions and used minimum, average, and maximum of the literature value as the minimum, most probable, and maximum values.
  - Criterion 4.3. If less than 5 data points can be found in the literature, we selected uniform distributions and used 80%, 100%, and 120% of the average value as lower bound, baseline, and upper bounds.

A complete list of distributions for each parameter used in the model can be found below (**Table S11**).

**Table S11.** List of parameters included in the uncertainty analyses. TP = technological parameters; DV = decision variables; CP = contextual parameters.

| Parameters <sup>a</sup>                 | TP | DV | CP | Unit                                         | Criterion | Dist.      | Lower | Baseline | Upper | Std Dev |
|-----------------------------------------|----|----|----|----------------------------------------------|-----------|------------|-------|----------|-------|---------|
| <b><i>Feedstock characteristics</i></b> |    |    |    |                                              |           |            |       |          |       |         |
| ww_2_dry_sludge <sup>b</sup>            |    |    | •  | dry tonne·d <sup>-1</sup> ·MGD <sup>-1</sup> | #3        | Uniform    | 0.846 | 0.94     | 1.034 |         |
| sludge_moisture                         |    |    | •  | -                                            | #2        | Uniform    | 0.6   | 0.7      | 0.8   |         |
| sludge_dw_ash                           |    |    | •  | -                                            | #4.2      | Triangular | 0.174 | 0.257    | 0.414 |         |
| sludge_afdw_lipid                       |    |    | •  | -                                            | #4.2      | Triangular | 0.08  | 0.204    | 0.308 |         |
| sludge_afdw_protein                     |    |    | •  | -                                            | #4.2      | Triangular | 0.38  | 0.463    | 0.51  |         |

|                     |   |                                     |      |            |        |        |        |
|---------------------|---|-------------------------------------|------|------------|--------|--------|--------|
| fog_moisture        | • | -                                   | #2   | Uniform    | 0.1    | 0.35   | 0.6    |
| fog_dw_ash          | • | -                                   | #4.3 | Uniform    | 0.015  | 0.019  | 0.022  |
| fog_afdw_lipid      | • | -                                   | #4.2 | Triangular | 0.912  | 0.987  | 1      |
| fog_afdw_protein    | • | -                                   | #4.2 | Triangular | 0      | 0.002  | 0.012  |
| food_moisture       | • | -                                   | #2   | Uniform    | 0.68   | 0.74   | 0.80   |
| food_dw_ash         | • | -                                   | #4.2 | Triangular | 0.025  | 0.0679 | 0.126  |
| food_afdw_lipid     | • | -                                   | #2   | Uniform    | 0.13   | 0.22   | 0.30   |
| food_afdw_protein   | • | -                                   | #2   | Uniform    | 0.15   | 0.2    | 0.25   |
| green_moisture      | • | -                                   | #4.2 | Triangular | 0.052  | 0.342  | 0.69   |
| green_dw_ash        | • | -                                   | #4.2 | Triangular | 0.012  | 0.134  | 0.483  |
| green_afdw_lipid    | • | -                                   | #2   | Uniform    | 0.0104 | 0.018  | 0.0259 |
| green_afdw_protein  | • | -                                   | #2   | Uniform    | 0.016  | 0.049  | 0.082  |
| manure_moisture     | • | -                                   | #4.2 | Triangular | 0.174  | 0.663  | 0.798  |
| manure_dw_ash       | • | -                                   | #4.2 | Triangular | 0.138  | 0.306  | 0.43   |
| manure_afdw_lipid   | • | -                                   | #4.2 | Triangular | 0.038  | 0.092  | 0.247  |
| manure_afdw_protein | • | -                                   | #4.2 | Triangular | 0.143  | 0.216  | 0.264  |
| lipid_2_C           | • | -                                   | #3   | Uniform    | 0.675  | 0.75   | 0.825  |
| protein_2_C         | • | -                                   | #3   | Uniform    | 0.491  | 0.545  | 0.600  |
| carbo_2_C           | • | -                                   | #3   | Uniform    | 0.36   | 0.4    | 0.44   |
| lipid_2_H           | • | -                                   | #3   | Uniform    | 0.113  | 0.125  | 0.138  |
| protein_2_H         | • | -                                   | #3   | Uniform    | 0.061  | 0.068  | 0.075  |
| carbo_2_H           | • | -                                   | #3   | Uniform    | 0.06   | 0.067  | 0.073  |
| protein_2_N         | • | -                                   | #3   | Uniform    | 0.143  | 0.159  | 0.175  |
| sludge_N_2_P        | • | -                                   | #4.2 | Triangular | 0.194  | 0.393  | 0.556  |
| fog_N_2_P           | • | -                                   | #4.2 | Triangular | 0      | 0.011  | 0.035  |
| food_N_2_P          | • | -                                   | #4.2 | Triangular | 0.115  | 0.150  | 0.286  |
| green_N_2_P         | • | -                                   | #3   | Uniform    | 0.187  | 0.208  | 0.229  |
| manure_N_2_P        | • | -                                   | #4.3 | Uniform    | 0.253  | 0.317  | 0.380  |
| operation_hour      | • | hr·yr <sup>-1</sup>                 | #1   | Triangular | 7390   | 7920   | 8450   |
| <b>HTL</b>          |   |                                     |      |            |        |        |        |
| heating U           | • | kW·m <sup>-2</sup> ·K <sup>-1</sup> | #2   | Uniform    | 0.0170 | 0.0199 | 0.0227 |

|                               |   |                                                |      |            |          |          |          |
|-------------------------------|---|------------------------------------------------|------|------------|----------|----------|----------|
| lipid_2_biocrude              | • | -                                              | #1   | Triangular | 0.692    | 0.846    | 1        |
| protein_2_biocrude            | • | -                                              | #1   | Normal     |          | 0.445    | 0.030    |
| carbo_2_biocrude              | • | -                                              | #1   | Normal     |          | 0.205    | 0.050    |
| protein_2_gas                 | • | -                                              | #1   | Normal     |          | 0.074    | 0.020    |
| carbo_2_gas                   | • | -                                              | #1   | Normal     |          | 0.418    | 0.030    |
| biocrude_C_slope              | • | -                                              | #1   | Normal     |          | -8.37    | 0.939    |
| biocrude_C_intercept          | • | -                                              | #1   | Normal     |          | 68.6     | 0.367    |
| biocrude_N_slope              | • | -                                              | #1   | Normal     |          | 0.133    | 0.005    |
| biocrude_H_slope              | • | -                                              | #1   | Normal     |          | -2.61    | 0.352    |
| biocrude_H_intercept          | • | -                                              | #1   | Normal     |          | 8.20     | 0.138    |
| HTLaqueous_C_slope            | • | -                                              | #1   | Normal     |          | 478      | 18.878   |
| TOC_TC                        | • | -                                              | #1   | Triangular | 0.715    | 0.764    | 0.813    |
| hydrochar_C_slope             | • | -                                              | #1   | Normal     |          | 1.750    | 0.122    |
| biocrude_moisture_content     | • | -                                              | #4.2 | Triangular | 0.035    | 0.0631   | 0.102    |
| hydrochar_P_recovery_ratio    | • | -                                              | #2   | Uniform    | 0.84     | 0.86     | 0.88     |
| <b>Acid Extraction</b>        |   |                                                |      |            |          |          |          |
| acid_vol                      | • | -                                              | #2   | Uniform    | 4        | 7        | 10       |
| P_recovery_ratio              | • | -                                              | #2   | Uniform    | 0.7      | 0.8      | 0.9      |
| <b>Struvite Precipitation</b> |   |                                                |      |            |          |          |          |
| target_pH                     | • | -                                              | #2   | Uniform    | 8.5      | 9        | 9.5      |
| P_pre_recovery_ratio          | • | -                                              | #4.2 | Triangular | 0.7      | 0.828    | 0.95     |
| <b>CHG</b>                    |   |                                                |      |            |          |          |          |
| WHSV                          | • | kg·hr <sup>-1</sup> ·kg catalyst <sup>-1</sup> | #4.2 | Triangular | 2.86     | 3.56     | 3.99     |
| catalyst_lifetime             | • | hr                                             | #1   | Triangular | 3960     | 7920     | 15800    |
| gas_C_to_total_C              | • | -                                              | #4.2 | Triangular | 0.189    | 0.598    | 0.780    |
| <b>Membrane Distillation</b>  |   |                                                |      |            |          |          |          |
| influent_pH                   | • | -                                              | #2   | Uniform    | 7.91     | 8.16     | 8.41     |
| target_pH                     | • | -                                              | #2   | Uniform    | 10       | 10       | 11.8     |
| relative surface area         | • | -                                              | #3   | Uniform    | 0.00075  | 0.000833 | 0.000917 |
| $D_m$                         | • | m <sup>2</sup> ·s <sup>-1</sup>                | #3   | Uniform    | 2.05E-05 | 2.28E-05 | 2.51E-05 |
| porosity                      | • | -                                              | #3   | Uniform    | 0.81     | 0.9      | 0.99     |



|                             |   |                                                            |      |            |          |          |          |
|-----------------------------|---|------------------------------------------------------------|------|------------|----------|----------|----------|
| thickness                   | • | m                                                          | #3   | Uniform    | 6.3E-05  | 7.0E-05  | 7.7E-05  |
| tortuosity                  | • | -                                                          | #3   | Uniform    | 1.08     | 1.20     | 1.32     |
| $K_a$                       | • | $\text{m}\cdot\text{s}^{-1}$                               | #3   | Uniform    | 1.58E-05 | 1.75E-05 | 1.93E-05 |
| capacity                    | • | $\text{kg}\cdot\text{m}^{-2}\cdot\text{h}^{-1}$            | #3   | Uniform    | 5.41     | 6.01     | 6.61     |
| <b>Hydrotreating</b>        |   |                                                            |      |            |          |          |          |
| WHSV                        | • | $\text{kg}\cdot\text{hr}^{-1}\cdot\text{kg catalyst}^{-1}$ | #3   | Uniform    | 0.563    | 0.625    | 0.688    |
| catalyst_lifetime           | • | hr                                                         | #1   | Triangular | 7920     | 15800    | 39600    |
| hydrogen_rxned_to_biocrude  | • | -                                                          | #3   | Uniform    | 0.0414   | 0.0460   | 0.0506   |
| PSA_efficiency              | • | -                                                          | #2   | Uniform    | 0.8      | 0.9      | 0.9      |
| hydrogen_excess             | • | -                                                          | #4.3 | Uniform    | 2.4      | 3        | 3.6      |
| hydrocarbon_ratio           | • | -                                                          | #3   | Uniform    | 0.788    | 0.875    | 0.963    |
| <b>Hydrocracking</b>        |   |                                                            |      |            |          |          |          |
| WHSV                        | • | $\text{kg}\cdot\text{hr}^{-1}\cdot\text{kg catalyst}^{-1}$ | #3   | Uniform    | 0.563    | 0.625    | 0.688    |
| catalyst_lifetime           | • | hr                                                         | #3   | Uniform    | 35600    | 39600    | 43600    |
| hydrogen_rxned_to_heavy_oil | • | -                                                          | #3   | Uniform    | 0.0101   | 0.0113   | 0.0124   |
| hydrogen_excess             | • | -                                                          | #4.3 | Uniform    | 4.44     | 5.56     | 6.67     |
| hydrocarbon_ratio           | • | -                                                          | #3   | Uniform    | 0.9      | 1        | 1        |
| <b>TEA</b>                  |   |                                                            |      |            |          |          |          |
| IRR (waste)                 | • | -                                                          | #1   | Triangular | 0%       | 3%       | 5%       |
| IRR (biofuel)               | • | -                                                          | #1   | Triangular | 5%       | 10%      | 15%      |
| HTL_TIC_factor              | • | -                                                          | #1   | Triangular | 0.6      | 1.0      | 1.4      |
| CHG_TIC_factor              | • | -                                                          | #1   | Triangular | 0.6      | 1.0      | 1.4      |
| hydrotreating_TIC_factor    | • | -                                                          | #1   | Triangular | 0.6      | 1.0      | 1.4      |
| CHP_unit_TIC                | • | $\text{\$}\cdot\text{kW}^{-1}$                             | #4.3 | Uniform    | 980      | 1230     | 1470     |
| makeup_water                | • | $\text{\$}\cdot\text{kg}^{-1}$                             | #3   | Uniform    | 0.000475 | 0.000528 | 0.000581 |
| 5%_sulfuric_acid            | • | $\text{\$}\cdot\text{kg}^{-1}$                             | #4.1 | Triangular | 0.00599  | 0.00658  | 0.0145   |
| MgCl <sub>2</sub>           | • | $\text{\$}\cdot\text{kg}^{-1}$                             | #4.2 | Triangular | 0.525    | 0.545    | 0.57     |
| MgO                         | • | $\text{\$}\cdot\text{kg}^{-1}$                             | #2   | Uniform    | 0.1      | 0.2      | 0.3      |
| H <sub>2</sub>              | • | $\text{\$}\cdot\text{kg}^{-1}$                             | #3   | Uniform    | 1.45     | 1.61     | 1.77     |
| NH <sub>4</sub> Cl          | • | $\text{\$}\cdot\text{kg}^{-1}$                             | #2   | Uniform    | 0.12     | 0.13     | 0.14     |
| NaOH                        | • | $\text{\$}\cdot\text{kg}^{-1}$                             | #3   | Uniform    | 0.473    | 0.526    | 0.578    |

|                                                                       |   |                      |      |            |        |        |        |
|-----------------------------------------------------------------------|---|----------------------|------|------------|--------|--------|--------|
| 7.8%_Ru/C                                                             | • | \$·kg <sup>-1</sup>  | #1   | Triangular | 67.3   | 135    | 269    |
| membrane                                                              | • | \$·kg <sup>-1</sup>  | #3   | Uniform    | 84.0   | 93.3   | 102    |
| natural_gas                                                           | • | \$·kg <sup>-1</sup>  | #4.1 | Triangular | 0.121  | 0.168  | 0.361  |
| CoMo_alumina                                                          | • | \$·kg <sup>-1</sup>  | #3   | Uniform    | 34.9   | 38.8   | 42.7   |
| (NH <sub>4</sub> ) <sub>2</sub> SO <sub>4</sub>                       | • | \$·kg <sup>-1</sup>  | #4.2 | Triangular | 0.164  | 0.324  | 0.463  |
| gasoline                                                              | • | \$·gal <sup>-1</sup> | #4.1 | Triangular | 2.01   | 2.66   | 4.11   |
|                                                                       |   | \$·kg <sup>-1</sup>  |      |            | 0.708  | 0.939  | 1.45   |
| diesel                                                                | • | \$·gal <sup>-1</sup> | #4.1 | Triangular | 2.40   | 3.13   | 5.34   |
|                                                                       |   | \$·kg <sup>-1</sup>  |      |            | 0.746  | 0.972  | 1.66   |
| struvite                                                              | • | \$·kg <sup>-1</sup>  | #1   | Triangular | 0.419  | 0.661  | 1.21   |
| electricity price                                                     | • | \$·kWh <sup>-1</sup> | #4.2 | Triangular | 0.0667 | 0.0688 | 0.0718 |
| <b>LCA</b>                                                            |   |                      |      |            |        |        |        |
| all impact indicators for all impact items listed in <b>Table S10</b> |   |                      | #3   | Uniform    | 0.9*X  | 1*X    | 1.1*X  |

<sup>a</sup> Explanation of parameter names are available online.<sup>18</sup>

<sup>b</sup> Only for when wastewater sludge as the feedstock and water resource recovery facility (WRRF) size as the independent variable.

## S7. Supplemental results

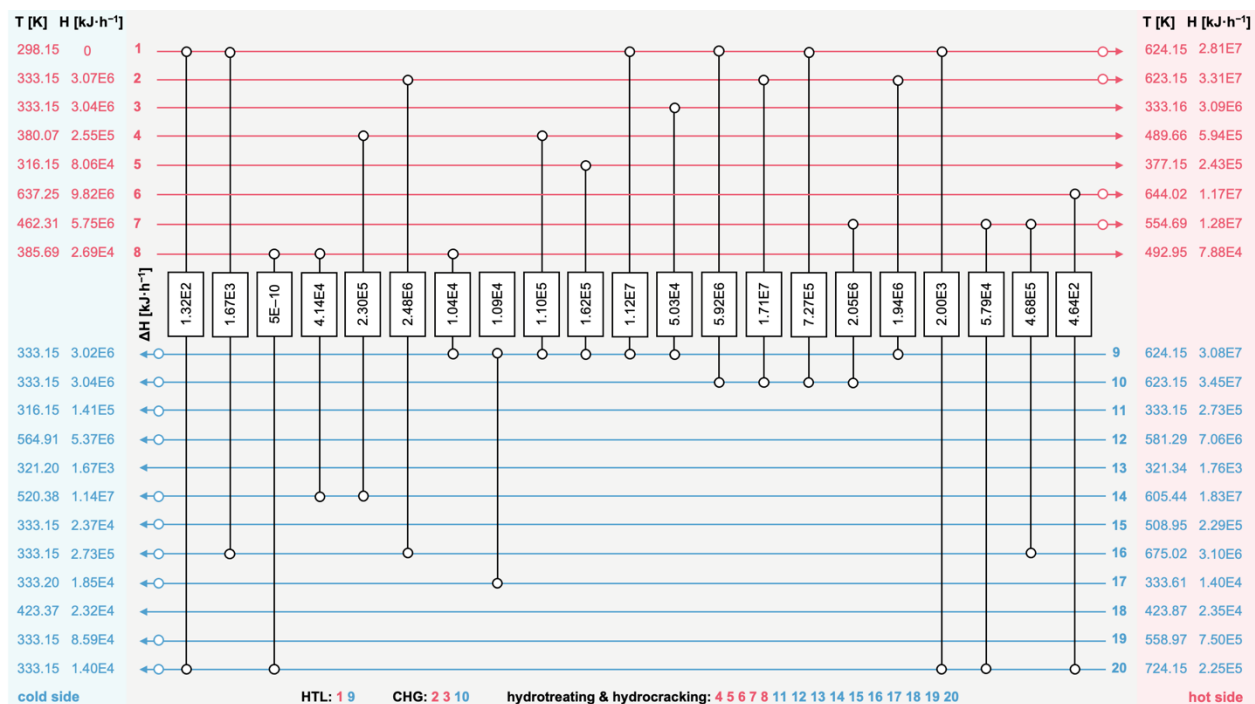

**Figure S1.** Pinch analysis for the heat transfers in the heat exchanger network (when the feedstock was wastewater sludge). Red horizontal lines represent streams that were heated, and blue horizontal lines represent streams that were cooled. Vertical lines bound by black outlined circles indicate heat transfer across process streams, with the amount of energy transfer marked in the middle squares. Red and blue outlined circles on horizontal lines indicate additional heating or cooling was needed for the streams to reach the final temperature. Units associated with the streams were (HTL) 1, 9; (CHG) 2, 3, 10; (hydrotreating & hydrocracking) 4, 5, 6, 7, 8, 11, 12, 13, 14, 15, 16, 17, 18, 19, 20.

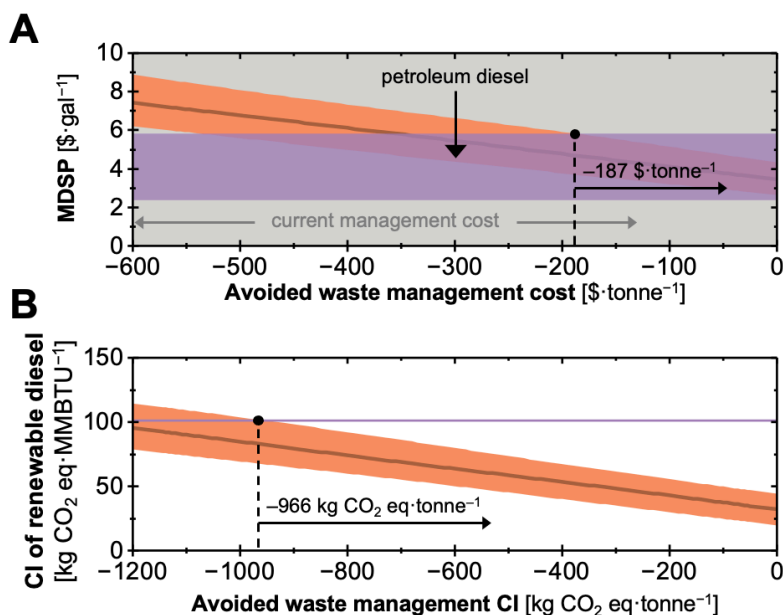

**Figure S2.** (A) Minimum diesel selling price (MDSP) and (B) carbon intensity (CI) of HTL-based resource recovery systems for fats, oils, and greases (FOG) as a commodity. Middle lines and the band represent 50<sup>th</sup> and 5<sup>th</sup>/95<sup>th</sup> percentiles of 1,000 Monte Carlo simulations. Purple band/line indicate the market price of diesel (data from 2018 to 2022; 2.37 to 5.81  $\text{\$}\cdot\text{gal}^{-1}$ <sup>47</sup>) in (A) and petroleum diesel carbon intensity (101  $\text{kg CO}_2 \text{ eq}\cdot\text{MMBTU}^{-1}$ <sup>48</sup>) in (B). Vertical dashed lines indicate the break-even point where the 95<sup>th</sup> percentile of simulated HTL-based systems is equivalent to the upper level of the current diesel price or carbon intensity. Arrows are oriented to highlight the x-axis values that represent the opportunity space for the HTL-based system.

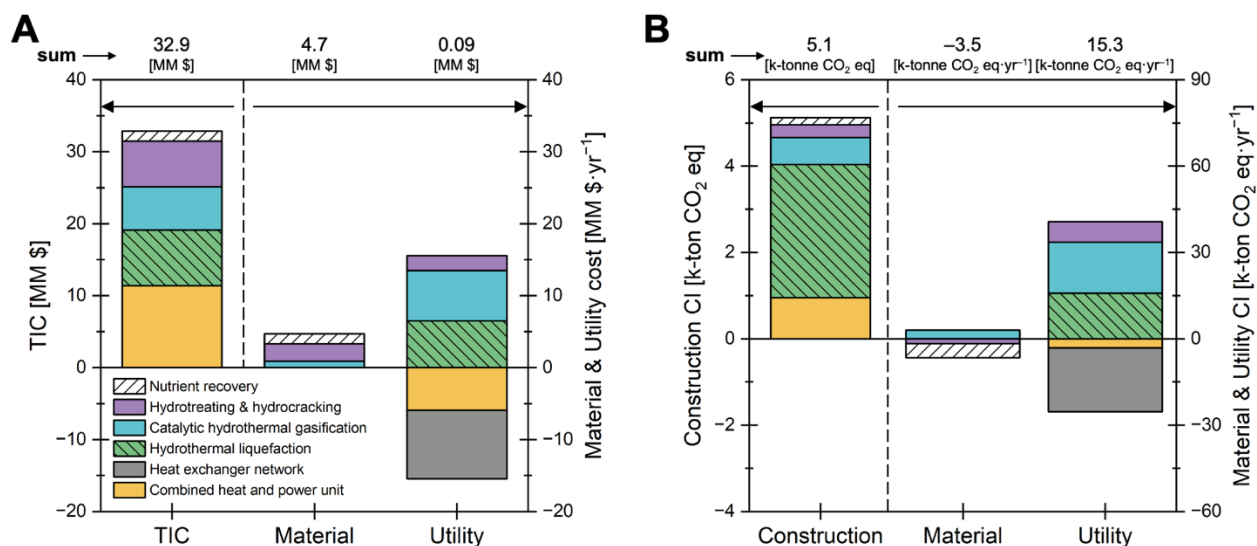

**Figure S3.** Breakdowns of categorized (A) cost and (B) CI to each area of the hydrothermal sludge management system. The left stacked bar in each figure is associated with the left y-axis while the middle and right stacked bars are associated with the right y-axis, as indicated by the black arrows. TIC represents the total installed cost. *Utility* in both figures includes heating, cooling, and electricity. The sum of each column is listed above the figures. A tabulated breakdown of data can be accessed online.<sup>18</sup>

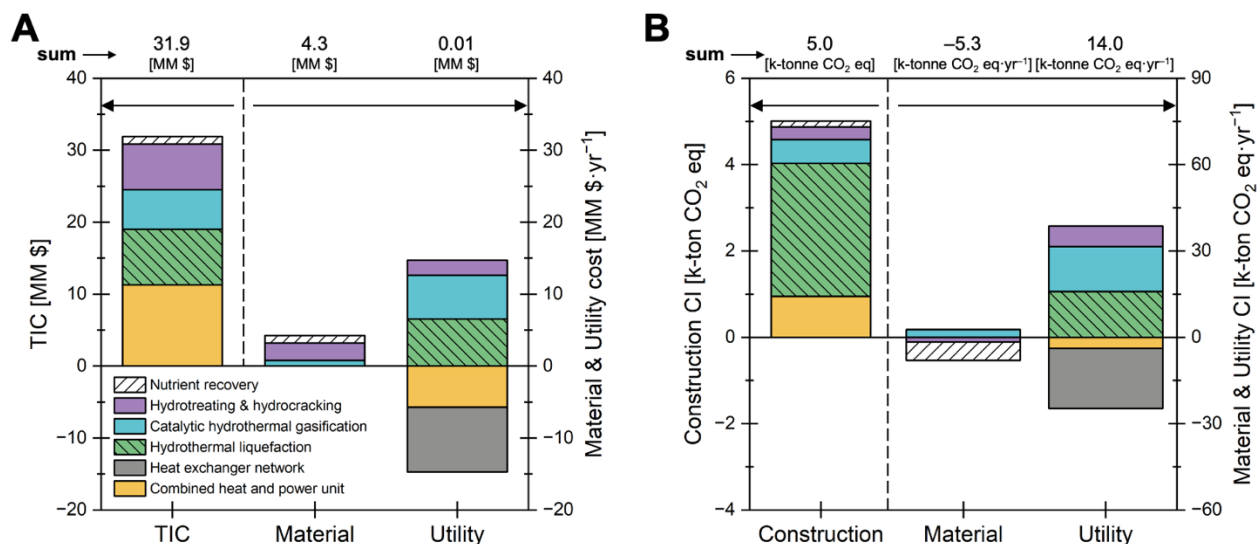

**Figure S4.** Breakdowns of categorized (A) cost and (B) CI to each area of the hydrothermal wastewater sludge management system (after removing the acid extraction from the original design, Alternative 1). The left stacked bar in each figure is associated with the left y-axis while the middle and right stacked bars are associated with the right y-axis, as indicated by the black arrows. TIC represents the total installed cost. *Utility* in both figures includes heating, cooling, and electricity. The sum of each column is listed above the figures. A tabulated breakdown of data can be accessed online.<sup>18</sup>

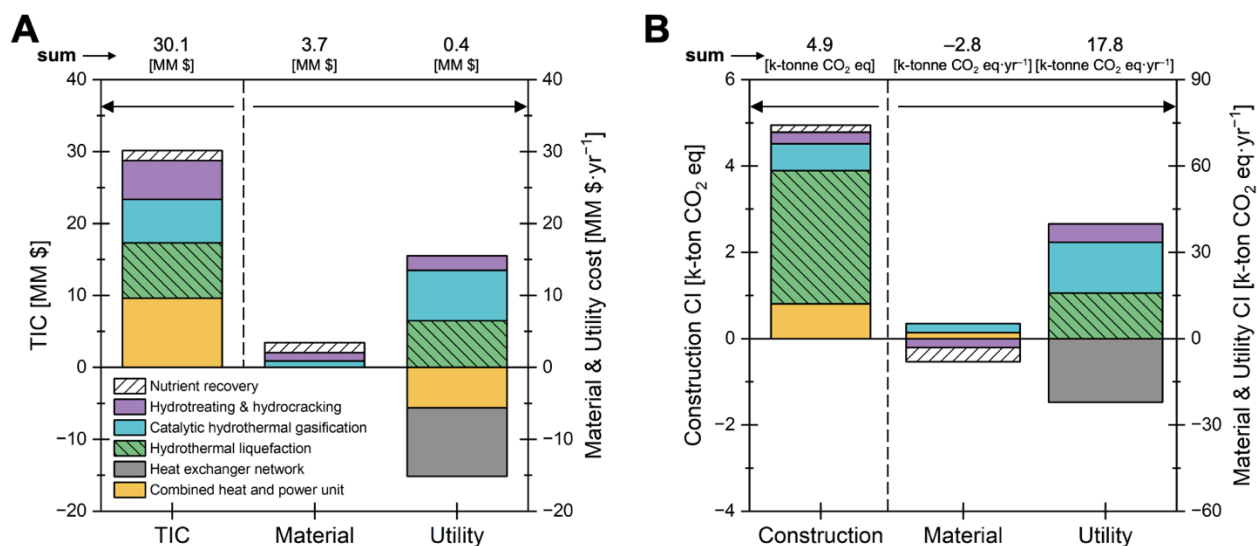

**Figure S5.** Breakdowns of categorized (A) cost and (B) CI to each area of the hydrothermal wastewater sludge management system (after adding a PSA unit to the original design, Alternative 2). The left stacked bar in each figure is associated with the left y-axis while the middle and right stacked bars are associated with the right y-axis, as indicated by the black arrows. TIC represents the total installed cost. *Utility* in both figures includes heating, cooling, and electricity. The sum of each column is listed above the figures. A tabulated breakdown of data can be accessed online.<sup>18</sup>

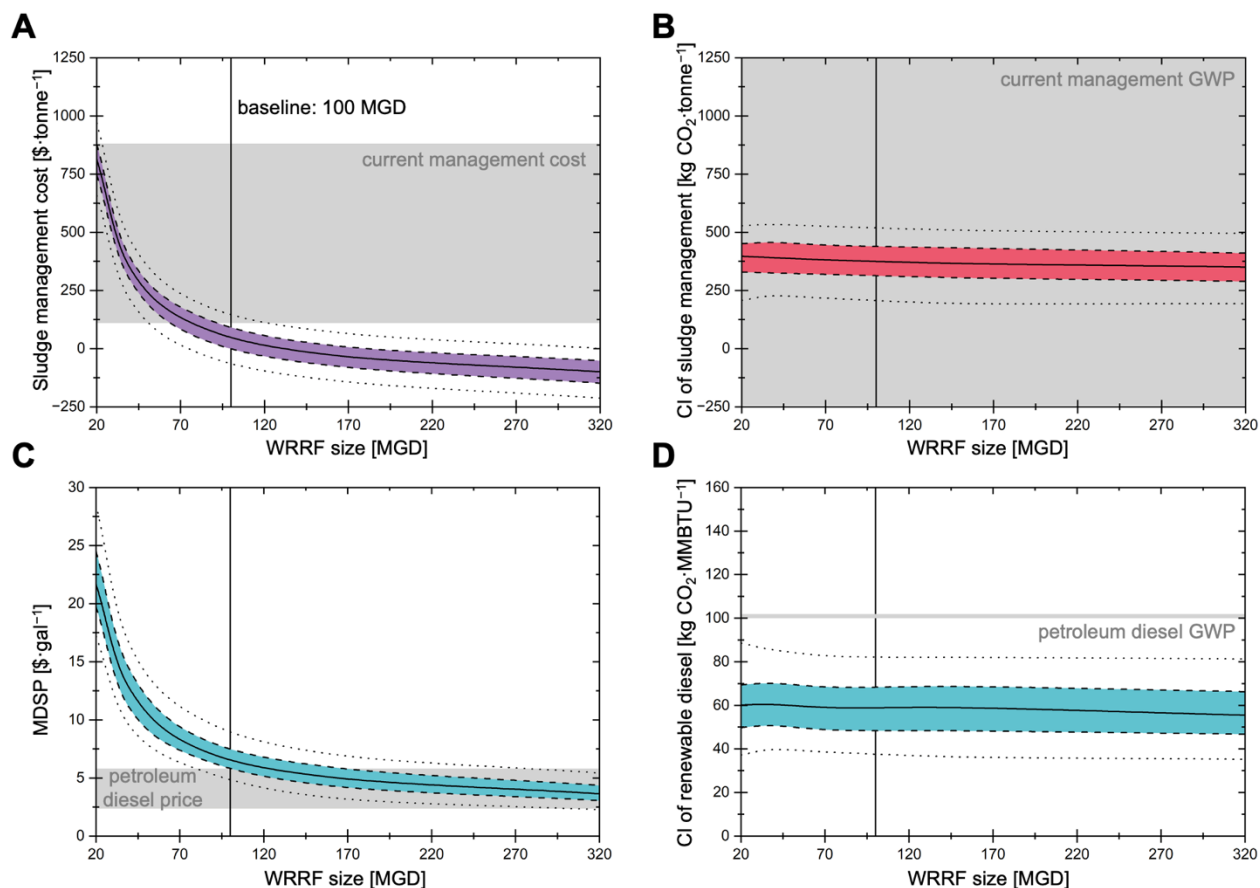

**Figure S6.** The effects of the water resource recovery facility (WRRF) size on (A) hydrothermal wastewater sludge management cost, (B) hydrothermal wastewater sludge management carbon intensity (CI), (C) MDSP, and (D) biofuel production CI. Figures (A) and (B) are from the waste management perspective, whereas Figures (C) and (D) are from the renewable diesel production perspective. Dotted, dashed, and the middle lines represented 5<sup>th</sup>/95<sup>th</sup>, 25<sup>th</sup>/75<sup>th</sup>, and 50<sup>th</sup> percentiles from 1,000 Monte Carlo simulations. The vertical straight lines indicate the baseline WRRF size (100 MGD) used in this study. Gray shaded areas in each figure represent (A) current wastewater sludge management cost, (B) current wastewater sludge management CI (only covers part of the current value [-245 to 2200 kg CO<sub>2</sub> eq·tonne<sup>-1</sup>] for figure readability), (C) commercial diesel price range, and (D) petroleum diesel production CI.

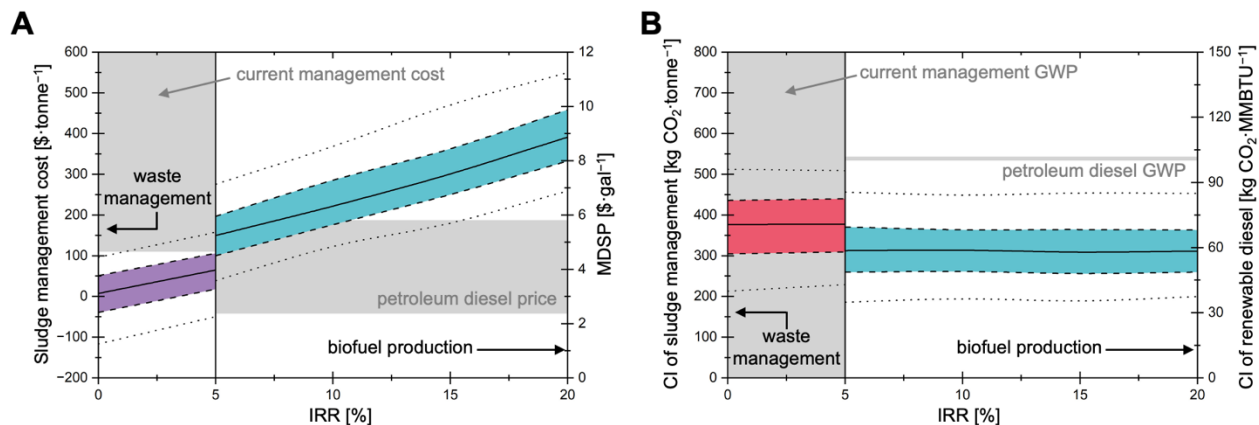

**Figure S7.** (A) The effects of the internal return of return on (purple, left panel) hydrothermal wastewater sludge management cost and (blue, right panel) MDSP. (B) The CI of (red, left panel) hydrothermal wastewater sludge management and (blue, right panel) biofuel production. The left side of each figure is from the waste management perspective, whereas the right side of each figure is from the renewable diesel production perspective. Dotted, dashed, and the middle lines represent 5<sup>th</sup>/95<sup>th</sup>, 25<sup>th</sup>/75<sup>th</sup>, and 50<sup>th</sup> percentiles from 1,000 Monte Carlo simulations. Shaded areas in each figure represent (A, left panel) current wastewater sludge management cost (only covers part of the current value [110 to 882  $\text{\$}\cdot\text{tonne}^{-1}$ ] for figure readability), (A, right panel) commercial diesel price range, (B, left panel) current wastewater sludge management CI (only covers part of the current value [-245 to 2200  $\text{kg CO}_2\text{ eq}\cdot\text{tonne}^{-1}$ ] for figure readability), and (B, right panel) petroleum diesel production CI.

**Table S12.** Element (in kg·h<sup>-1</sup>) and energy (in GJ·h<sup>-1</sup>) distribution along HTL-based treatment trains for different feedstocks.

| Stream                                          | Wastewater sludge       | FOG        | Food waste | Green waste | Animal manure |
|-------------------------------------------------|-------------------------|------------|------------|-------------|---------------|
| <b>Carbon (C)</b>                               |                         |            |            |             |               |
| Feedstock                                       | 1600                    | 3020       | 1950       | 1350        | 1410          |
| Biocrude                                        | 1030 (64%) <sup>a</sup> | 2880 (95%) | 1190 (61%) | 556 (41%)   | 761 (54%)     |
| Aqueous                                         | 380 (24%)               | 2.9 (0%)   | 206 (11%)  | 43.3 (3%)   | 171 (12%)     |
| Off-gas                                         | 146 (9%)                | 9.9 (0%)   | 313 (16%)  | 404 (30%)   | 273 (19%)     |
| Hydrochar                                       | 44.6 (3%)               | 2.0 (0%)   | 241 (12%)  | 351 (26%)   | 203 (14%)     |
| hydrotreating naphtha                           | 231 (14%)               | 589 (19%)  | 265 (14%)  | 132 (10%)   | 174 (12%)     |
| hydrotreating diesel                            | 607 (38%)               | 1550 (51%) | 699 (36%)  | 348 (26%)   | 457 (32%)     |
| hydrotreating heavy oil                         | 104 (7%)                | 266 (9%)   | 120 (6%)   | 59.7 (4%)   | 78.4 (6%)     |
| hydrotreating gas                               | 77.8 (5%)               | 199 (7%)   | 89.5 (5%)  | 44.5 (3%)   | 58.5 (4%)     |
| hydrotreating wastewater                        | 10.2 (1%)               | 277 (9%)   | 19.1 (1%)  | 0 (0%)      | 0 (0%)        |
| hydrocracking naphtha                           | 29.9 (2%)               | 76.3 (3%)  | 34.4 (2%)  | 17.1 (1%)   | 22.5 (2%)     |
| hydrocracking diesel                            | 59.2 (4%)               | 151 (5%)   | 68.1 (3%)  | 33.9 (3%)   | 44.6 (3%)     |
| hydrocracking gas                               | 12.6 (1%)               | 32.2 (1%)  | 14.5 (1%)  | 7.2 (1%)    | 9.5 (1%)      |
| AcidEx residual                                 | 44.6 (3%)               | 2.0 (0%)   | 241 (12%)  | 351 (26%)   | 203 (14%)     |
| CHG influent                                    | 380 (24%)               | 2.9 (0%)   | 206 (11%)  | 43.3 (3%)   | 171 (12%)     |
| CHG effluent                                    | 181 (11%)               | 1.4 (0%)   | 98.4 (5%)  | 20.7 (2%)   | 81.9 (6%)     |
| CHG gas                                         | 200 (11%)               | 1.5 (0%)   | 107 (6%)   | 22.5 (2%)   | 89.5 (6%)     |
| MemDis wastewater                               | 181 (11%)               | 1.4 (0%)   | 98.4 (5%)  | 20.7 (2%)   | 81.9 (6%)     |
| <b>Nitrogen (N)</b>                             |                         |            |            |             |               |
| Feedstock                                       | 214                     | 3.0        | 123        | 25.7        | 98.6          |
| Biocrude                                        | 61.1 (28%)              | 2.2 (72%)  | 40.3 (33%) | 4.2 (17%)   | 21.1 (21%)    |
| Aqueous                                         | 153 (72%)               | 0.8 (28%)  | 83.2 (67%) | 21.5 (83%)  | 77.5 (79%)    |
| hydrotreating naphtha                           | 0.8 (0%)                | 2.1 (69%)  | 0.9 (1%)   | 0.5 (2%)    | 0.6 (1%)      |
| hydrotreating wastewater                        | 60.2 (28%)              | 0.1 (3%)   | 39.4 (32%) | 3.8 (15%)   | 20.5 (21%)    |
| Struvite                                        | 25.3 (12%)              | 0 (0%)     | 7.0 (6%)   | 1.7 (6%)    | 9.7 (10%)     |
| CHG influent                                    | 128 (60%)               | 0.8 (27%)  | 76.2 (62%) | 19.8 (77%)  | 67.8 (69%)    |
| CHG effluent                                    | 128 (60%)               | 0.8 (27%)  | 76.2 (62%) | 19.8 (77%)  | 67.8 (69%)    |
| (NH <sub>4</sub> ) <sub>2</sub> SO <sub>4</sub> | 127 (59%)               | 0.8 (27%)  | 75.8 (61%) | 19.7 (77%)  | 67.5 (68%)    |
| MemDis wastewater                               | 0.6 (0%)                | 0 (0%)     | 0.3 (0%)   | 0.1 (0%)    | 0.3 (0%)      |
| <b>Phosphorus (P)</b>                           |                         |            |            |             |               |
| Feedstock                                       | 82.0                    | 0          | 22.5       | 5.3         | 31.2          |
| Aqueous                                         | 11.5 (14%)              | 0 (14%)    | 3.2 (14%)  | 0.7 (14%)   | 4.4 (14%)     |
| Hydrochar                                       | 70.6 (86%)              | 0 (86%)    | 19.3 (86%) | 4.6 (86%)   | 26.9 (86%)    |
| AcidEx extractant                               | 56.4 (69%)              | 0 (69%)    | 15.5 (69%) | 3.7 (69%)   | 21.5 (69%)    |
| AcidEx residual                                 | 14.2 (17%)              | 0 (17%)    | 3.8 (17%)  | 0.9 (17%)   | 5.3 (17%)     |
| Struvite                                        | 56.0 (68%)              | 0 (68%)    | 15.4 (69%) | 3.7 (69%)   | 21.4 (68%)    |
| CHG influent                                    | 11.8 (14%)              | 0 (15%)    | 3.2 (14%)  | 0.8 (14%)   | 4.5 (14%)     |
| CHG effluent                                    | 11.8 (14%)              | 0 (15%)    | 3.2 (14%)  | 0.8 (14%)   | 4.5 (14%)     |



| MemDis wastewater            | 11.8 (14%)              | 0 (15%)    | 3.2 (14%)  | 0.8 (14%)  | 4.5 (14%)  |
|------------------------------|-------------------------|------------|------------|------------|------------|
| <i>Energy (E)</i>            |                         |            |            |            |            |
| Feedstock                    | 71.0                    | 164        | 83.4       | 47.6       | 56.9       |
| Biocrude                     | 46.4 (65%)              | 152 (93%)  | 54.1 (65%) | 23.4 (49%) | 33.6 (59%) |
| Off-gas                      | 2.4 (3%)                | 0.2 (0%)   | 4.5 (5%)   | 5.7 (12%)  | 3.9 (7%)   |
| CHG gas                      | 11.5 (16%)              | 0.1 (0%)   | 6.2 (7%)   | 1.3 (3%)   | 5.1 (9%)   |
| hydrotreating H <sub>2</sub> | 25.9                    | 66.1       | 29.5       | 14.8       | 19.4       |
| hydrotreating naphtha        | 12.4 (13%) <sup>b</sup> | 31.8 (14%) | 14.3 (13%) | 7.1 (11%)  | 9.4 (12%)  |
| hydrotreating diesel         | 32.8 (34%)              | 83.8 (36%) | 37.7 (33%) | 18.8 (30%) | 24.7 (32%) |
| hydrotreating heavy oil      | 5.6 (6%)                | 14.4 (6%)  | 6.5 (6%)   | 3.2 (5%)   | 4.2 (6%)   |
| hydrotreating gas            | 22.4 (23%)              | 57.2 (25%) | 25.5 (23%) | 12.8 (20%) | 16.7 (22%) |
| hydrocracking H <sub>2</sub> | 1.1                     | 2.8        | 1.3        | 0.6        | 0.8        |
| hydrocracking naphtha        | 1.7 (2%) <sup>c</sup>   | 4.3 (2%)   | 2.0 (2%)   | 1.0 (2%)   | 1.3 (2%)   |
| hydrocracking diesel         | 3.3 (3%)                | 8.5 (4%)   | 3.8 (3%)   | 1.9 (3%)   | 2.5 (3%)   |
| hydrocracking gas            | 1.6 (2%)                | 4.0 (2%)   | 1.8 (2%)   | 0.9 (1%)   | 1.2 (2%)   |

<sup>a</sup> % of C, N, P, or E from the feedstock.

<sup>b</sup> % of E from the feedstock and hydrotreating H<sub>2</sub>.

<sup>c</sup> % of E from the feedstock, hydrotreating H<sub>2</sub>, and hydrocracking H<sub>2</sub>.

**Table S13.** Spearman's rank order correlation coefficients for hydrothermal wastewater sludge management (only parameters with  $p < 0.05$  and  $|p| > 0.1$  are listed). Indicators include sludge management cost, minimum diesel selling price (MDSP), the carbon intensity of sludge management from the waste management perspective ( $CI_{\text{sludge}}$ ), and the carbon intensity of diesel production from the renewable diesel production perspective ( $CI_{\text{diesel}}$ ).

| Sub-category                 | Parameters                          | Sludge management cost | MDSP  | $CI_{\text{sludge}}$ | $CI_{\text{diesel}}$ |
|------------------------------|-------------------------------------|------------------------|-------|----------------------|----------------------|
| <i>Contextual parameters</i> |                                     |                        |       |                      |                      |
| -                            | plant size                          | -0.30                  | -0.29 | -0.06                | -0.06                |
|                              | internal rate of return (IRR)       | 0.33                   | 0.30  | -0.06                | -0.07                |
| feedstock characterization   | feedstock ash content               | 0.34                   | 0.47  | 0.43                 | 0.56                 |
|                              | feedstock lipid content             | -0.22                  | -0.37 | -0.11                | -0.30                |
|                              | feedstock protein content           | -0.12                  | -0.15 | -0.12                | -0.14                |
|                              | feedstock protein:N ratio           | -0.13                  | -0.11 | -0.09                | -0.06                |
|                              | feedstock N:P ratio                 | -0.10                  | -0.06 | 0.28                 | 0.24                 |
|                              | struvite price                      | -0.28                  | -0.29 | -0.06                | -0.05                |
| material & product price     | ammonium sulfate price              | -0.12                  | -0.12 | 0.02                 | 0.00                 |
|                              | gasoline price                      | -0.16                  | -0.16 | -0.03                | -0.02                |
|                              | diesel price                        | -0.52                  | -0.02 | -0.02                | -0.05                |
|                              | <i>Technological parameters</i>     |                        |       |                      |                      |
| HTL                          | lipid to biocrude conversion        | -0.18                  | -0.25 | -0.05                | -0.16                |
|                              | protein to biocrude conversion      | -0.13                  | -0.21 | -0.09                | -0.19                |
|                              | carbohydrate to biocrude conversion | -0.16                  | -0.24 | -0.16                | -0.28                |
|                              | aqueous TOC:TC ratio <sup>a</sup>   | 0.01                   | 0.01  | 0.14                 | 0.11                 |
| CHG                          | CHG yield                           | 0.04                   | -0.01 | -0.43                | -0.35                |

|                                   |                                  |       |       |       |       |
|-----------------------------------|----------------------------------|-------|-------|-------|-------|
|                                   | catalyst lifetime                | -0.05 | -0.03 | -0.28 | -0.20 |
| nutrient recovery                 | phosphorus acid extraction ratio | -0.01 | -0.03 | 0.13  | 0.12  |
|                                   | reacted hydrogen amount          | 0.01  | 0.04  | -0.16 | -0.10 |
| hydrotreating                     | excess hydrogen amount           | 0.01  | 0.04  | -0.36 | -0.27 |
|                                   | hydrotreating yield              | -0.25 | -0.32 | -0.06 | -0.23 |
| <b><i>Decision parameters</i></b> |                                  |       |       |       |       |
| -                                 | operation hour                   | -0.06 | -0.08 | 0.18  | 0.14  |

<sup>a</sup> Total organic carbon to total carbon ratio in the HTL aqueous phase.

**Table S14.** Life cycle environmental impact results across feedstocks and categories.

| <b>Feedstock</b>                                           | <b>CFs</b><br>unit                                         | <b>ACD</b><br>[H <sup>+</sup> ]-eq           | <b>ECO</b><br>kg 2,4-D-eq | <b>EUT</b><br>kg N-eq | <b>OZD</b><br>kg CFC-11-eq | <b>PHO</b><br>kg NO <sub>x</sub> -eq | <b>CAR</b><br>kg benzene-eq | <b>NCA</b><br>kg toluene-eq | <b>RES</b><br>kg PM <sub>2.5</sub> -eq |  |
|------------------------------------------------------------|------------------------------------------------------------|----------------------------------------------|---------------------------|-----------------------|----------------------------|--------------------------------------|-----------------------------|-----------------------------|----------------------------------------|--|
| <b>Wastewater<br/>sludge</b>                               | <i>normalized by per tonne waste managed</i>               |                                              |                           |                       |                            |                                      |                             |                             |                                        |  |
|                                                            | 5 <sup>th</sup>                                            | 77.8                                         | 1630                      | -5.46E-01             | -1.11E-04                  | 3.62E-01                             | 1.61                        | 5790                        | 3.52E-01                               |  |
|                                                            | median                                                     | 157                                          | 2610                      | -4.13E-01             | -6.45E-05                  | 9.38E-01                             | 3.38                        | 10600                       | 7.14E-01                               |  |
|                                                            | 95 <sup>th</sup>                                           | 274                                          | 4470                      | -2.81E-01             | -1.75E-05                  | 1.80E+00                             | 5.06                        | 16600                       | 1.24E+00                               |  |
|                                                            | <i>normalized by per MMBTU diesel produced<sup>a</sup></i> |                                              |                           |                       |                            |                                      |                             |                             |                                        |  |
|                                                            | 5 <sup>th</sup>                                            | 14.9                                         | 196                       | -3.78E-02             | 4.77E-06                   | 8.59E-02                             | 1.67E-01                    | 804                         | 6.39E-02                               |  |
|                                                            | median                                                     | 26.2                                         | 330                       | -2.41E-02             | 8.52E-06                   | 1.67E-01                             | 4.42E-01                    | 1390                        | 1.19E-01                               |  |
|                                                            | 95 <sup>th</sup>                                           | 42.8                                         | 574                       | -8.91E-03             | 1.39E-05                   | 2.85E-01                             | 6.96E-01                    | 2300                        | 1.93E-01                               |  |
|                                                            | <b>FOG</b>                                                 | <i>normalized by per tonne waste managed</i> |                           |                       |                            |                                      |                             |                             |                                        |  |
| 5 <sup>th</sup>                                            |                                                            | 23.2                                         | 1580                      | -4.56E-01             | -2.93E-04                  | -1.45E-01                            | 3.81                        | 6490                        | -1.74E-01                              |  |
| median                                                     |                                                            | 104                                          | 2390                      | -3.01E-01             | -1.97E-04                  | 5.13E-01                             | 4.35                        | 8340                        | 3.28E-01                               |  |
| 95 <sup>th</sup>                                           |                                                            | 234                                          | 3790                      | -1.34E-01             | -9.75E-05                  | 1.35E+00                             | 5.00                        | 11600                       | 8.92E-01                               |  |
| <i>normalized by per MMBTU diesel produced<sup>a</sup></i> |                                                            |                                              |                           |                       |                            |                                      |                             |                             |                                        |  |
| 5 <sup>th</sup>                                            |                                                            | 7.07                                         | 79.3                      | 6.85E-03              | 3.88E-06                   | 3.88E-02                             | 1.95E-01                    | 372                         | 1.61E-02                               |  |
| median                                                     |                                                            | 11.8                                         | 121                       | 1.25E-02              | 7.12E-06                   | 7.69E-02                             | 2.28E-01                    | 480                         | 4.50E-02                               |  |
| 95 <sup>th</sup>                                           |                                                            | 17.7                                         | 199                       | 2.02E-02              | 1.13E-05                   | 1.19E-01                             | 2.66E-01                    | 645                         | 7.26E-02                               |  |
| <b>Food waste</b>                                          |                                                            | <i>normalized by per tonne waste managed</i> |                           |                       |                            |                                      |                             |                             |                                        |  |
|                                                            | 5 <sup>th</sup>                                            | 140                                          | 2080                      | -3.67E-01             | -1.27E-04                  | 7.73E-01                             | 4.44                        | 15500                       | 6.29E-01                               |  |
|                                                            | median                                                     | 231                                          | 3220                      | -2.40E-01             | -6.86E-05                  | 1.44E+00                             | 6.20                        | 23700                       | 1.07E+00                               |  |
|                                                            | 95 <sup>th</sup>                                           | 389                                          | 5360                      | -1.04E-01             | -1.08E-05                  | 2.44E+00                             | 8.31                        | 33100                       | 1.63E+00                               |  |
|                                                            | <i>normalized by per MMBTU diesel produced<sup>a</sup></i> |                                              |                           |                       |                            |                                      |                             |                             |                                        |  |
|                                                            | 5 <sup>th</sup>                                            | 20.6                                         | 214                       | -9.73E-03             | 4.80E-06                   | 1.27E-01                             | 4.53E-01                    | 1640                        | 8.96E-02                               |  |
|                                                            | median                                                     | 32.3                                         | 364                       | 2.18E-03              | 9.15E-06                   | 2.12E-01                             | 6.92E-01                    | 2660                        | 1.48E-01                               |  |
|                                                            | 95 <sup>th</sup>                                           | 53.3                                         | 630                       | 1.42E-02              | 1.47E-05                   | 3.48E-01                             | 9.95E-01                    | 4030                        | 2.31E-01                               |  |
|                                                            | <b>Green<br/>waste</b>                                     | <i>normalized by per tonne waste managed</i> |                           |                       |                            |                                      |                             |                             |                                        |  |
| 5 <sup>th</sup>                                            |                                                            | 241                                          | 2570                      | -4.69E-02             | -5.28E-05                  | 1.61                                 | 5.98                        | 23100                       | 1.12                                   |  |
| median                                                     |                                                            | 324                                          | 3870                      | 5.02E-02              | -4.47E-05                  | 2.18                                 | 8.06                        | 33700                       | 1.47                                   |  |
|                                                            | 95 <sup>th</sup>                                           | 490                                          | 6460                      | 1.63E-01              | 4.80E-05                   | 3.26                                 | 10.2                        | 45200                       | 2.04                                   |  |

|                      |                                                            |      |      |           |           |          |          |       |          |
|----------------------|------------------------------------------------------------|------|------|-----------|-----------|----------|----------|-------|----------|
|                      | <i>normalized by per MMBTU diesel produced<sup>a</sup></i> |      |      |           |           |          |          |       |          |
|                      | 5 <sup>th</sup>                                            | 47.4 | 491  | 1.70E-02  | 7.93E-06  | 3.29E-01 | 1.08     | 4550  | 2.21E-01 |
|                      | median                                                     | 78.9 | 851  | 3.91E-02  | 1.60E-05  | 5.49E-01 | 1.78     | 7380  | 3.58E-01 |
|                      | 95 <sup>th</sup>                                           | 151  | 1800 | 8.09E-02  | 3.52E-05  | 1.04E+00 | 2.99     | 13000 | 6.64E-01 |
|                      | <i>normalized by per tonne waste managed</i>               |      |      |           |           |          |          |       |          |
|                      | 5 <sup>th</sup>                                            | 167  | 2120 | -2.65E-01 | -7.73E-05 | 1.08E+00 | 3.96     | 15100 | 8.34E-01 |
|                      | median                                                     | 247  | 3250 | -1.53E-01 | -2.94E-05 | 1.65E+00 | 5.58     | 21500 | 1.16E+00 |
|                      | 95 <sup>th</sup>                                           | 381  | 5240 | -3.79E-02 | 1.84E-05  | 2.59E+00 | 7.55     | 30700 | 1.66E+00 |
| <b>Animal manure</b> | <i>normalized by per MMBTU diesel produced<sup>a</sup></i> |      |      |           |           |          |          |       |          |
|                      | 5 <sup>th</sup>                                            | 30.6 | 327  | -1.26E-02 | 6.18E-06  | 2.06E-01 | 6.20E-01 | 2240  | 1.48E-01 |
|                      | median                                                     | 49.8 | 559  | 2.88E-03  | 1.17E-05  | 3.30E-01 | 9.69E-01 | 3730  | 2.29E-01 |
|                      | 95 <sup>th</sup>                                           | 79.1 | 972  | 1.93E-02  | 1.98E-05  | 5.34E-01 | 1.39E+00 | 5950  | 3.45E-01 |

<sup>a</sup> The normalization for diesel produced did not account for environmental impacts offset by avoiding traditional waste management methods.

## References

- (1) Grady, C. P. L., Jr.; Daigger, G. T.; Love, N. G.; Filipe, C. D. M. *Biological Wastewater Treatment*, 3rd ed.; CRC Press: Boca Raton, 2011. <https://doi.org/10.1201/b13775>.
- (2) Lin, N.; Zhu, W.; Fan, X.; Wang, C.; Chen, C.; Zhang, H.; Chen, L.; Wu, S.; Cui, Y. Key Factor on Improving Secondary Advanced Dewatering Performance of Municipal Dewatered Sludge: Selective Oxidative Decomposition of Polysaccharides. *Chemosphere* **2020**, *249*, 126108. <https://doi.org/10.1016/j.chemosphere.2020.126108>.
- (3) Snowden-Swan, L. J.; Billing, J. M.; Thorson, M. R.; Schmidt, A. J.; Santosa, D. M.; Jones, S. B.; Hallen, R. T. *Wet Waste Hydrothermal Liquefaction and Biocrude Upgrading to Hydrocarbon Fuels: 2019 State of Technology*; PNNL-29882; Pacific Northwest National Lab. (PNNL), Richland, WA (United States), 2020. <https://doi.org/10.2172/1617028>.
- (4) Snowden-Swan, L. J.; Billing, J. M.; Thorson, M. R.; Schmidt, A. J.; Jiang, Y.; Santosa, D. M.; Seiple, T. E.; Daniel, R. C.; Burns, C. A.; Li, S.; Hart, T. R.; Fox, S. P.; Olarte, M. V.; Kallupalayam Ramasamy, K.; Anderson, D. B.; Hallen, R. T.; Radovcich, S.; Mathias, P. M.; Taylor, M. A. *Wet Waste Hydrothermal Liquefaction and Biocrude Upgrading to Hydrocarbon Fuels: 2020 State of Technology*; PNNL-30982; Pacific Northwest National Lab. (PNNL), Richland, WA (United States), 2021. <https://doi.org/10.2172/1771363>.
- (5) Snowden-Swan, L. J.; Li, S.; Jiang, Y.; Thorson, M. R.; Schmidt, A. J.; Seiple, T. E.; Billing, J. M.; Santosa, D. M.; Hart, T. R.; Fox, S. P.; Cronin, D.; Kallupalayam Ramasamy, K.; Anderson, D. B.; Hallen, R. T.; Fonoll-Almansa, X.; Norton, J. *Wet Waste Hydrothermal Liquefaction and Biocrude Upgrading to Hydrocarbon Fuels: 2021 State of Technology*; PNNL-32731; Pacific Northwest National Lab. (PNNL), Richland, WA (United States), 2022. <https://doi.org/10.2172/1863608>.
- (6) Snowden-Swan, L. J.; Li, S.; Thorson, M. R.; Schmidt, A. J.; Cronin, D. J.; Zhu, Y.; Hart, T. R.; Santosa, D. M.; Fox, S. P.; Lemmon, T. L.; Swita, M. S. *Wet Waste Hydrothermal Liquefaction and Biocrude Upgrading to Hydrocarbon Fuels: 2022 State of Technology*; PNNL-33622; Pacific Northwest National Lab. (PNNL), Richland, WA (United States), 2022. <https://doi.org/10.2172/1897670>.
- (7) Keener, K. M.; Ducoste, J. J.; Holt, L. M. Properties Influencing Fat, Oil, and Grease Deposit Formation. *Water Environ. Res.* **2008**, *80* (12), 2241–2246. <https://doi.org/10.2175/193864708X267441>.
- (8) da Silva Almeida, H.; Corrêa, O. A.; Eid, J. G.; Ribeiro, H. J.; de Castro, D. A. R.; Pereira, M. S.; Pereira, L. M.; de Andrade Aêncio, A.; Santos, M. C.; da Mota, S. A. P.; da Silva Souza, J. A.; Borges, L. E. P.; Mendonça, N. M.; Machado, N. T. Performance of Thermochemical Conversion of Fat, Oils, and Grease into Kerosene-like Hydrocarbons in Different Production Scales. *J. Anal. Appl. Pyrolysis* **2016**, *120*, 126–143. <https://doi.org/10.1016/j.jaap.2016.04.017>.
- (9) Cabrera, D. V.; Labatut, R. A. Outlook and Challenges for Recovering Energy and Water from Complex Organic Waste Using Hydrothermal Liquefaction. *Sustain. Energy Fuels* **2021**, *5* (8), 2201–2227. <https://doi.org/10.1039/D0SE01857K>.
- (10) Slopiecka, K.; Liberti, F.; Massoli, S.; Bartocci, P.; Fantozzi, F. Chemical and Physical Characterization of Food Waste to Improve Its Use in Anaerobic Digestion Plants. *Energy Nexus* **2022**, *5*, 100049. <https://doi.org/10.1016/j.nexus.2022.100049>.

- (11) Zhang, R.; El-Mashad, H. M.; Hartman, K.; Wang, F.; Liu, G.; Choate, C.; Gamble, P. Characterization of Food Waste as Feedstock for Anaerobic Digestion. *Bioresour. Technol.* **2007**, *98* (4), 929–935. <https://doi.org/10.1016/j.biortech.2006.02.039>.
- (12) Pour, F. H.; Makkawi, Y. T. A Review of Post-Consumption Food Waste Management and Its Potentials for Biofuel Production. *Energy Rep.* **2021**, *7*, 7759–7784. <https://doi.org/10.1016/j.egy.2021.10.119>.
- (13) Liu, X.; Xie, Y.; Sheng, H. Green Waste Characteristics and Sustainable Recycling Options. *Resour. Environ. Sustain.* **2023**, *11*, 100098. <https://doi.org/10.1016/j.resenv.2022.100098>.
- (14) Komilis, D. P.; Ham, R. K. The Effect of Lignin and Sugars to the Aerobic Decomposition of Solid Wastes. *Waste Manag.* **2003**, *23* (5), 419–423. [https://doi.org/10.1016/S0956-053X\(03\)00062-X](https://doi.org/10.1016/S0956-053X(03)00062-X).
- (15) Nynäs, A.-L.; Newson, W. R.; Johansson, E. Protein Fractionation of Green Leaves as an Underutilized Food Source—Protein Yield and the Effect of Process Parameters. *Foods* **2021**, *10* (11), 2533. <https://doi.org/10.3390/foods10112533>.
- (16) Lu, J.; Li, H.; Zhang, Y.; Liu, Z. Nitrogen Migration and Transformation during Hydrothermal Liquefaction of Livestock Manures. *ACS Sustain. Chem. Eng.* **2018**, *6* (10), 13570–13578. <https://doi.org/10.1021/acssuschemeng.8b03810>.
- (17) Li, Y.; Zhang, X.; Morgan, V. L.; Lohman, H. A. C.; Rowles, L. S.; Mittal, S.; Kogler, A.; Cusick, R. D.; Tarpeh, W. A.; Guest, J. S. QSDsan: An Integrated Platform for Quantitative Sustainable Design of Sanitation and Resource Recovery Systems. *Environ. Sci. Water Res. Technol.* **2022**, 10.1039.D2EW00455K. <https://doi.org/10.1039/D2EW00455K>.
- (18) *GitHub* - QSD-Group/EXPOsan at 2c9e246bb19cb67b8f8ac52ec4b978b2b118d12a. <https://github.com/QSD-Group/EXPOsan/tree/2c9e246bb19cb67b8f8ac52ec4b978b2b118d12a> (accessed 2023-11-06).
- (19) Jones, S. B.; Zhu, Y.; Anderson, D. B.; Hallen, R. T.; Elliott, D. C.; Schmidt, A. J.; Albrecht, K. O.; Hart, T. R.; Butcher, M. G.; Drennan, C.; Snowden-Swan, L. J.; Davis, R.; Kinchin, C. *Process Design and Economics for the Conversion of Algal Biomass to Hydrocarbons: Whole Algae Hydrothermal Liquefaction and Upgrading*; PNNL--23227, 1126336; 2014; p PNNL--23227, 1126336. <https://doi.org/10.2172/1126336>.
- (20) Cortes-Peña, Y.; Kumar, D.; Singh, V.; Guest, J. S. BioSTEAM: A Fast and Flexible Platform for the Design, Simulation, and Techno-Economic Analysis of Biorefineries under Uncertainty. *ACS Sustain. Chem. Eng.* **2020**, *8* (8), 3302–3310. <https://doi.org/10.1021/acssuschemeng.9b07040>.
- (21) *GitHub* - BioSTEAMDevelopmentGroup/biosteam at 0da3da0165078bbafea15caef70b17cfa40616e6. <https://github.com/BioSTEAMDevelopmentGroup/biosteam> (accessed 2023-11-06).
- (22) Li, Y.; Leow, S.; Fedders, A. C.; Sharma, B. K.; Guest, J. S.; Strathmann, T. J. Quantitative Multiphase Model for Hydrothermal Liquefaction of Algal Biomass. *Green Chem.* **2017**, *19* (4), 1163–1174. <https://doi.org/10.1039/C6GC03294J>.
- (23) Leow, S.; Shoener, B. D.; Li, Y.; DeBellis, J. L.; Markham, J.; Davis, R.; Laurens, L. M. L.; Pienkos, P. T.; Cook, S. M.; Strathmann, T. J.; Guest, J. S. A Unified Modeling Framework to Advance Biofuel Production from Microalgae. *Environ. Sci. Technol.* **2018**, *52* (22), 13591–13599. <https://doi.org/10.1021/acs.est.8b03663>.

- (24) Matayeva, A.; Rasmussen, S. R.; Biller, P. Distribution of Nutrients and Phosphorus Recovery in Hydrothermal Liquefaction of Waste Streams. *Biomass Bioenergy* **2022**, *156*, 106323. <https://doi.org/10.1016/j.biombioe.2021.106323>.
- (25) Ovsyannikova, E.; Kruse, A.; Becker, G. C. Feedstock-Dependent Phosphate Recovery in a Pilot-Scale Hydrothermal Liquefaction Bio-Crude Production. *Energies* **2020**, *13* (2), 379. <https://doi.org/10.3390/en13020379>.
- (26) Motavaf, B.; Savage, P. E. Effect of Process Variables on Food Waste Valorization via Hydrothermal Liquefaction. *ACS EST Eng.* **2021**, *1* (3), 363–374. <https://doi.org/10.1021/acsestengg.0c00115>.
- (27) Maag, A. R.; Paulsen, A. D.; Amundsen, T. J.; Yelvington, P. E.; Tompsett, G. A.; Timko, M. T. Catalytic Hydrothermal Liquefaction of Food Waste Using CeZrOx. *Energies* **2018**, *11* (3), 564. <https://doi.org/10.3390/en11030564>.
- (28) Aierzhati, A.; Stablein, M. J.; Wu, N. E.; Kuo, C.-T.; Si, B.; Kang, X.; Zhang, Y. Experimental and Model Enhancement of Food Waste Hydrothermal Liquefaction with Combined Effects of Biochemical Composition and Reaction Conditions. *Bioresour. Technol.* **2019**, *284*, 139–147. <https://doi.org/10.1016/j.biortech.2019.03.076>.
- (29) Ahmed Ebrahim, S.; Robertson, G.; Jiang, X.; Baranova, E. A.; Singh, D. Catalytic Hydrothermal Liquefaction of Food Waste: Influence of Catalysts on Bio-Crude Yield, Asphaltenes, and Pentane Soluble Fractions. *Fuel* **2022**, *324*, 124452. <https://doi.org/10.1016/j.fuel.2022.124452>.
- (30) Ellersdorfer, M. Hydrothermal Co-Liquefaction of Chlorella Vulgaris with Food Processing Residues, Green Waste and Sewage Sludge. *Biomass Bioenergy* **2020**, *142*, 105796. <https://doi.org/10.1016/j.biombioe.2020.105796>.
- (31) Cao, L.; Luo, G.; Zhang, S.; Chen, J. Bio-Oil Production from Eight Selected Green Landscaping Wastes through Hydrothermal Liquefaction. *RSC Adv.* **2016**, *6* (18), 15260–15270. <https://doi.org/10.1039/C5RA24760H>.
- (32) Knorr, D.; Lukas, J.; Schoen, P. *Production of Advanced Biofuels via Liquefaction - Hydrothermal Liquefaction Reactor Design: April 5, 2013*; NREL/SR-5100-60462, 1111191; 2013; p NREL/SR-5100-60462, 1111191. <https://doi.org/10.2172/1111191>.
- (33) Fakheri, A. A General Expression for the Determination of the Log Mean Temperature Correction Factor for Shell and Tube Heat Exchangers. *J. Heat Transf.* **2003**, *125* (3), 527–530. <https://doi.org/10.1115/1.1571078>.
- (34) Shoener, B. D.; Zhong, C.; Greiner, A. D.; Khunjar, W. O.; Hong, P.-Y.; Guest, J. S. Design of Anaerobic Membrane Bioreactors for the Valorization of Dilute Organic Carbon Waste Streams. *Energy Environ. Sci.* **2016**, *9* (3), 1102–1112. <https://doi.org/10.1039/C5EE03715H>.
- (35) Lorick, D.; Macura, B.; Ahlström, M.; Grimvall, A.; Harder, R. Effectiveness of Struvite Precipitation and Ammonia Stripping for Recovery of Phosphorus and Nitrogen from Anaerobic Digestate: A Systematic Review. *Environ. Evid.* **2020**, *9* (1), 27. <https://doi.org/10.1186/s13750-020-00211-x>.
- (36) Hanhoun, M.; Montastruc, L.; Azzaro-Pantel, C.; Biscans, B.; Frèche, M.; Pibouleau, L. Temperature Impact Assessment on Struvite Solubility Product: A Thermodynamic Modeling Approach. *Chem. Eng. J.* **2011**, *167* (1), 50–58. <https://doi.org/10.1016/j.cej.2010.12.001>.

- (37) Scheepers, D. M.; Tahir, A. J.; Brunner, C.; Guillen-Burrieza, E. Vacuum Membrane Distillation Multi-Component Numerical Model for Ammonia Recovery from Liquid Streams. *J. Membr. Sci.* **2020**, *614*, 118399. <https://doi.org/10.1016/j.memsci.2020.118399>.
- (38) Ding, Z.; Liu, L.; Li, Z.; Ma, R.; Yang, Z. Experimental Study of Ammonia Removal from Water by Membrane Distillation (MD): The Comparison of Three Configurations. *J. Membr. Sci.* **2006**, *286* (1), 93–103. <https://doi.org/10.1016/j.memsci.2006.09.015>.
- (39) Katyal, A.; Morrison, R. D. CHAPTER 11 - FORENSIC APPLICATIONS OF CONTAMINANT TRANSPORT MODELS IN THE SUBSURFACE. In *Introduction to Environmental Forensics (Second Edition)*; Murphy, B. L., Morrison, R. D., Eds.; Academic Press: Burlington, 2007; pp 513–575. <https://doi.org/10.1016/B978-012369522-2/50012-9>.
- (40) Spiller, L. L. Determination of Ammonia/Air Diffusion Coefficient Using Nafion Lined Tube. *Anal. Lett.* **1989**, *22* (11–12), 2561–2573. <https://doi.org/10.1080/00032718908052375>.
- (41) Brown, T. M.; Duan, P.; Savage, P. E. Hydrothermal Liquefaction and Gasification of Nannochloropsis Sp. *Energy Fuels* **2010**, *24* (6), 3639–3646. <https://doi.org/10.1021/ef100203u>.
- (42) Li, Y.; Zhang, X.; Morgan, V. L.; Lohman, H. A. C.; Rowles, L. S.; Mittal, S.; Kogler, A.; Cusick, R. D.; Tarpeh, W. A.; Guest, J. S. QSDsan: An Integrated Platform for Quantitative Sustainable Design of Sanitation and Resource Recovery Systems. *Environ. Sci. Water Res. Technol.* **2022**, *8* (10), 2289–2303. <https://doi.org/10.1039/D2EW00455K>.
- (43) Havukainen, J.; Nguyen, M. T.; Väisänen, S.; Horttanainen, M. Life Cycle Assessment of Small-Scale Combined Heat and Power Plant: Environmental Impacts of Different Forest Biofuels and Replacing District Heat Produced from Natural Gas. *J. Clean. Prod.* **2018**, *172*, 837–846. <https://doi.org/10.1016/j.jclepro.2017.10.241>.
- (44) Bare, J. TRACI 2.0: The Tool for the Reduction and Assessment of Chemical and Other Environmental Impacts 2.0. *Clean Technol. Environ. Policy* **2011**, *13* (5), 687–696. <https://doi.org/10.1007/s10098-010-0338-9>.
- (45) Ecoinvent 3.8 Database. Swiss Centre for Life Cycle Inventories (accessed 2023-01-06).
- (46) Li, Y.; Bhagwat, S. S.; Cortés-Peña, Y. R.; Ki, D.; Rao, C. V.; Jin, Y.-S.; Guest, J. S. Sustainable Lactic Acid Production from Lignocellulosic Biomass. *ACS Sustain. Chem. Eng.* **2021**, *9* (3), 1341–1351. <https://doi.org/10.1021/acssuschemeng.0c08055>.
- (47) *Gasoline and Diesel Fuel Update*. <https://www.eia.gov/petroleum/gasdiesel/index.php> (accessed 2023-03-14).
- (48) Pegallapati, A. K.; Dunn, J. B.; Frank, E. D.; Jones, S.; Zhu, Y.; Snowden-Swan, L.; Davis, R.; Kinchin, C. M. *Supply Chain Sustainability Analysis of Whole Algae Hydrothermal Liquefaction and Upgrading*; ANL/ESD--15/8, 1183770; 2015; p ANL/ESD--15/8, 1183770. <https://doi.org/10.2172/1183770>.
